# Supplementary material for: Structure–Activity Relationship Studies of Indolglyoxyl-Polyamine Conjugates as Antimicrobials and Antibiotic Potentiators
Source: MDPI journal article supplement (doi:10.3390/ph16060823), 2023-05-31
Supplement: s1 [file s1]

# Supporting Information

## Structure–Activity Relationship Studies of Indolglyoxyl-Polyamine Conjugates as Antimicrobials and Antibiotic Potentiators

Melissa M. Cadelis <sup>1,2</sup>, Tim Liu <sup>1</sup>, Kenneth Sue <sup>1</sup>, Florent Rouvier <sup>3</sup>, Marie-Lise Bourguet-Kondracki <sup>4</sup>, Jean Michel Brunel <sup>3</sup> and Brent R. Copp <sup>1,\*</sup>

<sup>1</sup> School of Chemical Sciences, The University of Auckland, Private Bag 92019, Auckland 1142, New Zealand

<sup>2</sup> School of Medical Sciences, The University of Auckland, Private Bag 92019, Auckland 1142, New Zealand

<sup>3</sup> UMR MD1 "Membranes et Cibles Thérapeutiques", U1261 INSERM, Faculté de Pharmacie, Aix-Marseille Université, 27 bd Jean Moulin, 13385 Marseille, France

<sup>4</sup> Laboratoire Molécules de Communication et Adaptation des Micro-organismes, UMR 7245 CNRS, Muséum National d'Histoire Naturelle, 57 Rue Cuvier (C.P. 54), 75005 Paris, France

\* Correspondence: b.copp@auckland.ac.nz

### Contents

|                                                                                                                                                                 |     |
|-----------------------------------------------------------------------------------------------------------------------------------------------------------------|-----|
| <b>Figure S1</b> <sup>1</sup> H (DMSO- <i>d</i> <sub>6</sub> , 400 MHz) and <sup>13</sup> C (DMSO- <i>d</i> <sub>6</sub> , 100 MHz) NMR spectra for <b>16</b>   | S3  |
| <b>Figure S2</b> <sup>1</sup> H (DMSO- <i>d</i> <sub>6</sub> , 400 MHz) and <sup>13</sup> C (DMSO- <i>d</i> <sub>6</sub> , 100 MHz) NMR spectra for <b>17a</b>  | S4  |
| <b>Figure S3</b> <sup>1</sup> H (DMSO- <i>d</i> <sub>6</sub> , 400 MHz) and <sup>13</sup> C (DMSO- <i>d</i> <sub>6</sub> , 100 MHz) NMR spectra for <b>17b</b>  | S5  |
| <b>Figure S4</b> <sup>1</sup> H (DMSO- <i>d</i> <sub>6</sub> , 400 MHz) and <sup>13</sup> C (DMSO- <i>d</i> <sub>6</sub> , 100 MHz) NMR spectra for <b>17d</b>  | S6  |
| <b>Figure S5</b> <sup>1</sup> H (DMSO- <i>d</i> <sub>6</sub> , 400 MHz) and <sup>13</sup> C (DMSO- <i>d</i> <sub>6</sub> , 100 MHz) NMR spectra for <b>18a</b>  | S7  |
| <b>Figure S6</b> <sup>1</sup> H (DMSO- <i>d</i> <sub>6</sub> , 400 MHz) and <sup>13</sup> C (DMSO- <i>d</i> <sub>6</sub> , 100 MHz) NMR spectra for <b>18b</b>  | S8  |
| <b>Figure S7</b> <sup>1</sup> H (DMSO- <i>d</i> <sub>6</sub> , 400 MHz) and <sup>13</sup> C (DMSO- <i>d</i> <sub>6</sub> , 100 MHz) NMR spectra for <b>18c</b>  | S9  |
| <b>Figure S8</b> <sup>1</sup> H (DMSO- <i>d</i> <sub>6</sub> , 400 MHz) and <sup>13</sup> C (DMSO- <i>d</i> <sub>6</sub> , 100 MHz) NMR spectra for <b>18d</b>  | S10 |
| <b>Figure S9</b> <sup>1</sup> H (DMSO- <i>d</i> <sub>6</sub> , 400 MHz) and <sup>13</sup> C (DMSO- <i>d</i> <sub>6</sub> , 100 MHz) NMR spectra for <b>18e</b>  | S11 |
| <b>Figure S10</b> <sup>1</sup> H (DMSO- <i>d</i> <sub>6</sub> , 500 MHz) and <sup>13</sup> C (DMSO- <i>d</i> <sub>6</sub> , 125 MHz) NMR spectra for <b>19a</b> | S12 |
| <b>Figure S11</b> <sup>1</sup> H (DMSO- <i>d</i> <sub>6</sub> , 400 MHz) and <sup>13</sup> C (DMSO- <i>d</i> <sub>6</sub> , 100 MHz) NMR spectra for <b>19b</b> | S13 |
| <b>Figure S12</b> <sup>1</sup> H (DMSO- <i>d</i> <sub>6</sub> , 400 MHz) and <sup>13</sup> C (DMSO- <i>d</i> <sub>6</sub> , 100 MHz) NMR spectra for <b>19d</b> | S14 |
| <b>Figure S13</b> <sup>1</sup> H (DMSO- <i>d</i> <sub>6</sub> , 400 MHz) and <sup>13</sup> C (DMSO- <i>d</i> <sub>6</sub> , 100 MHz) NMR spectra for <b>20a</b> | S15 |
| <b>Figure S14</b> <sup>1</sup> H (DMSO- <i>d</i> <sub>6</sub> , 400 MHz) and <sup>13</sup> C (DMSO- <i>d</i> <sub>6</sub> , 100 MHz) NMR spectra for <b>20b</b> | S16 |
| <b>Figure S15</b> <sup>1</sup> H (DMSO- <i>d</i> <sub>6</sub> , 400 MHz) and <sup>13</sup> C (DMSO- <i>d</i> <sub>6</sub> , 100 MHz) NMR spectra for <b>20c</b> | S17 |
| <b>Figure S16</b> <sup>1</sup> H (DMSO- <i>d</i> <sub>6</sub> , 400 MHz) and <sup>13</sup> C (DMSO- <i>d</i> <sub>6</sub> , 100 MHz) NMR spectra for <b>20d</b> | S18 |
| <b>Figure S17</b> <sup>1</sup> H (DMSO- <i>d</i> <sub>6</sub> , 400 MHz) and <sup>13</sup> C (DMSO- <i>d</i> <sub>6</sub> , 100 MHz) NMR spectra for <b>20e</b> | S19 |
| <b>Figure S18</b> <sup>1</sup> H (DMSO- <i>d</i> <sub>6</sub> , 500 MHz) and <sup>13</sup> C (DMSO- <i>d</i> <sub>6</sub> , 125 MHz) NMR spectra for <b>21a</b> | S20 |
| <b>Figure S19</b> <sup>1</sup> H (DMSO- <i>d</i> <sub>6</sub> , 400 MHz) and <sup>13</sup> C (DMSO- <i>d</i> <sub>6</sub> , 100 MHz) NMR spectra for <b>21b</b> | S21 |
| <b>Figure S20</b> <sup>1</sup> H (DMSO- <i>d</i> <sub>6</sub> , 400 MHz) and <sup>13</sup> C (DMSO- <i>d</i> <sub>6</sub> , 100 MHz) NMR spectra for <b>21c</b> | S22 |

|                                                                                                                               |     |
|-------------------------------------------------------------------------------------------------------------------------------|-----|
| <b>Figure S21</b> $^1\text{H}$ (DMSO- $d_6$ , 400 MHz) and $^{13}\text{C}$ (DMSO- $d_6$ , 100 MHz) NMR spectra for <b>21d</b> | S23 |
| <b>Figure S22</b> $^1\text{H}$ (DMSO- $d_6$ , 400 MHz) and $^{13}\text{C}$ (DMSO- $d_6$ , 100 MHz) NMR spectra for <b>21e</b> | S24 |
| <b>Figure S23</b> $^1\text{H}$ (DMSO- $d_6$ , 400 MHz) and $^{13}\text{C}$ (DMSO- $d_6$ , 100 MHz) NMR spectra for <b>22a</b> | S25 |
| <b>Figure S24</b> $^1\text{H}$ (DMSO- $d_6$ , 400 MHz) and $^{13}\text{C}$ (DMSO- $d_6$ , 100 MHz) NMR spectra for <b>22b</b> | S26 |
| <b>Figure S25</b> $^1\text{H}$ (DMSO- $d_6$ , 400 MHz) and $^{13}\text{C}$ (DMSO- $d_6$ , 100 MHz) NMR spectra for <b>22d</b> | S27 |
| <b>Figure S26</b> $^1\text{H}$ (DMSO- $d_6$ , 400 MHz) and $^{13}\text{C}$ (DMSO- $d_6$ , 100 MHz) NMR spectra for <b>23a</b> | S28 |
| <b>Figure S27</b> $^1\text{H}$ (DMSO- $d_6$ , 400 MHz) and $^{13}\text{C}$ (DMSO- $d_6$ , 100 MHz) NMR spectra for <b>23b</b> | S29 |
| <b>Figure S28</b> $^1\text{H}$ (DMSO- $d_6$ , 400 MHz) and $^{13}\text{C}$ (DMSO- $d_6$ , 100 MHz) NMR spectra for <b>23c</b> | S30 |
| <b>Figure S29</b> $^1\text{H}$ (DMSO- $d_6$ , 400 MHz) and $^{13}\text{C}$ (DMSO- $d_6$ , 100 MHz) NMR spectra for <b>23d</b> | S31 |
| <b>Figure S30</b> $^1\text{H}$ (DMSO- $d_6$ , 400 MHz) and $^{13}\text{C}$ (DMSO- $d_6$ , 100 MHz) NMR spectra for <b>23e</b> | S32 |

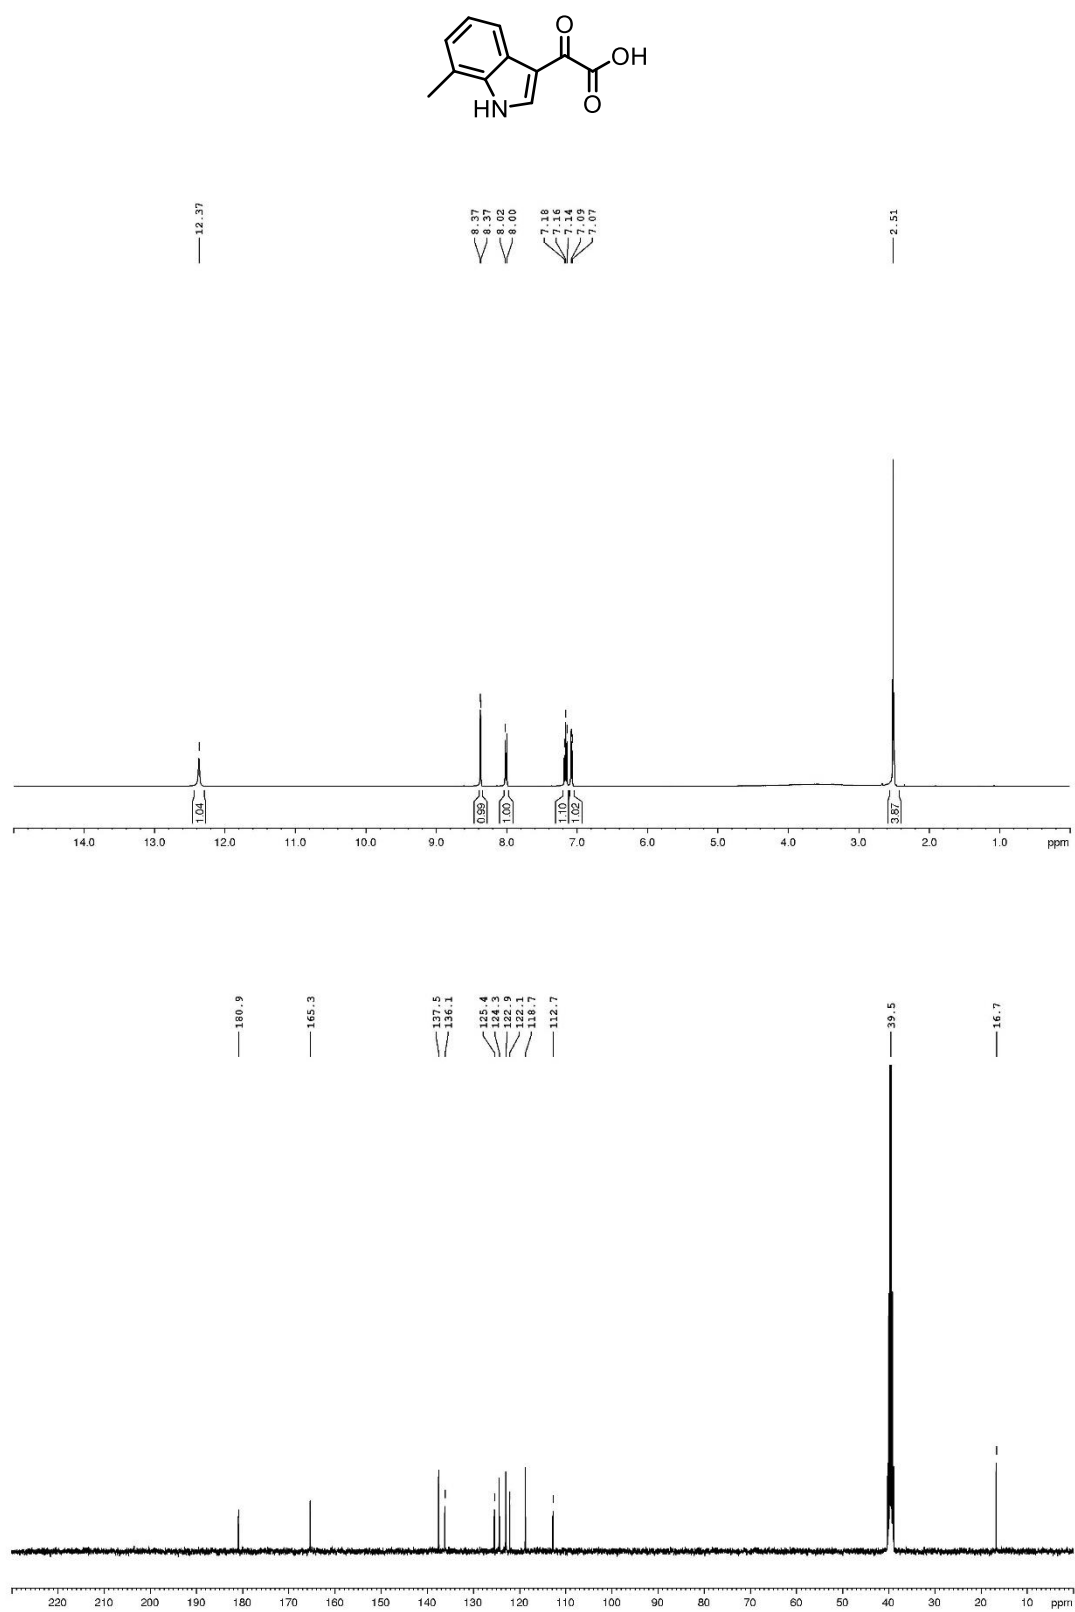

**Figure S1** <sup>1</sup>H (DMSO-*d*<sub>6</sub>, 400 MHz) and <sup>13</sup>C (DMSO-*d*<sub>6</sub>, 100 MHz) NMR spectra for **16**

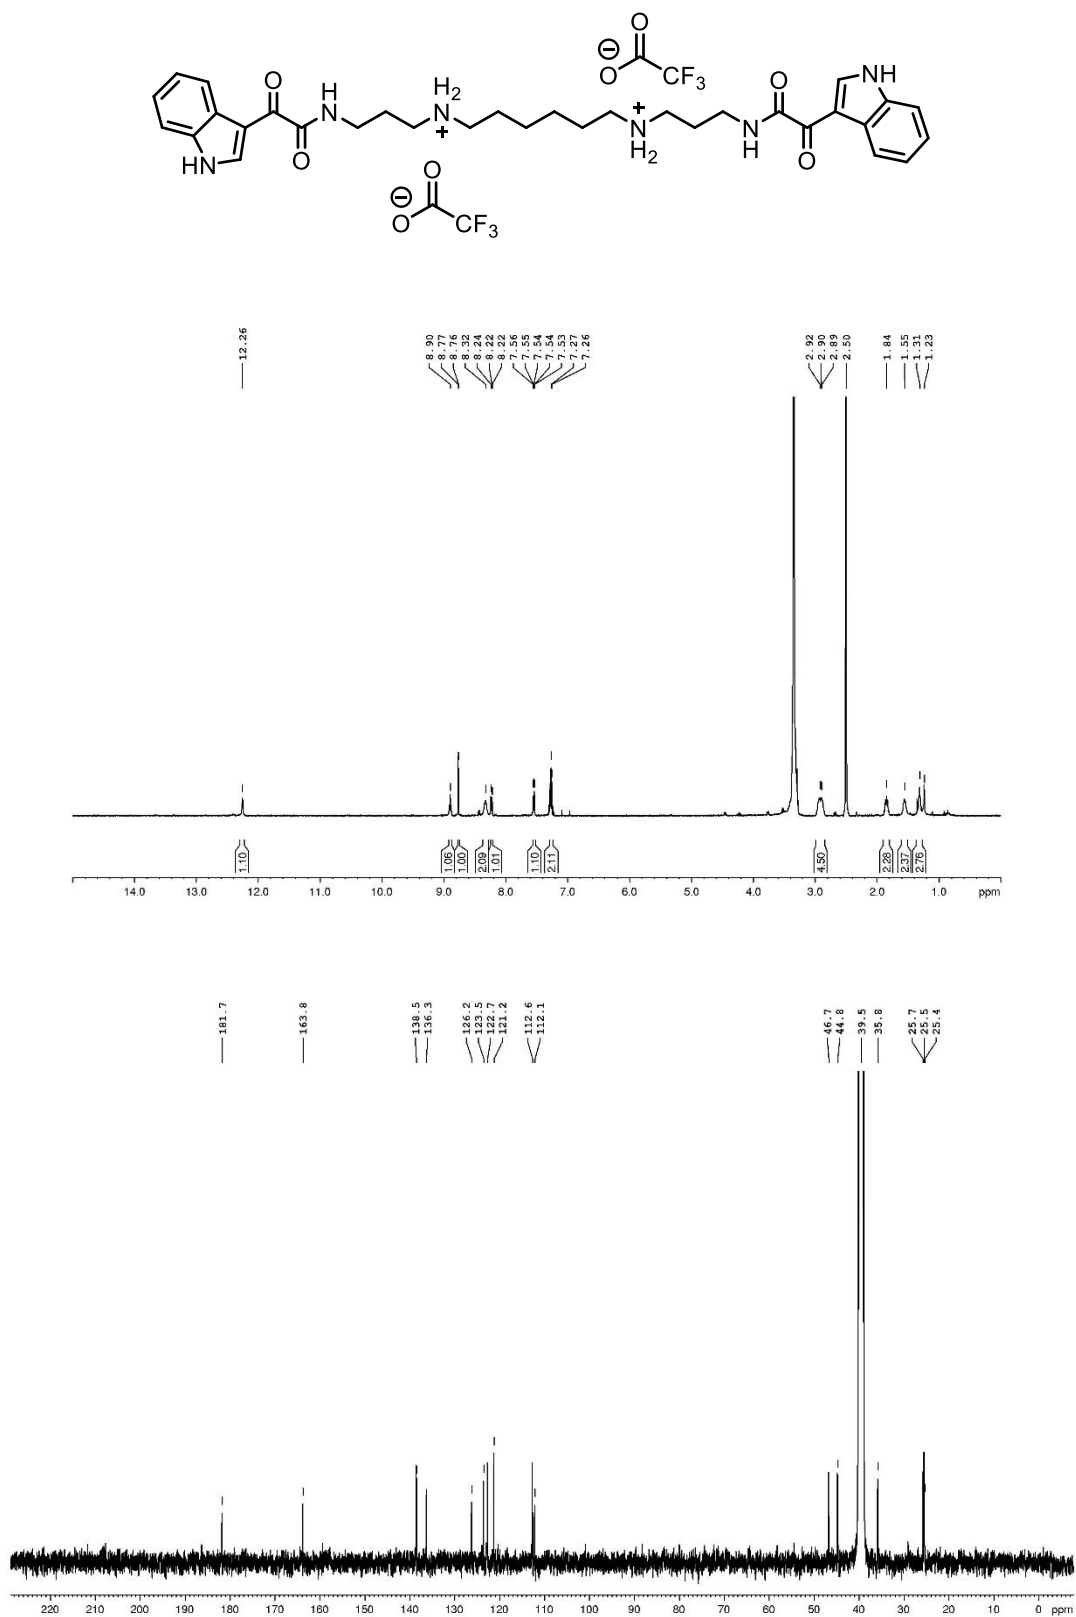

Figure S2  $^1\text{H}$  (DMSO- $d_6$ , 400 MHz) and  $^{13}\text{C}$  (DMSO- $d_6$ , 100 MHz) NMR spectra for **17a**

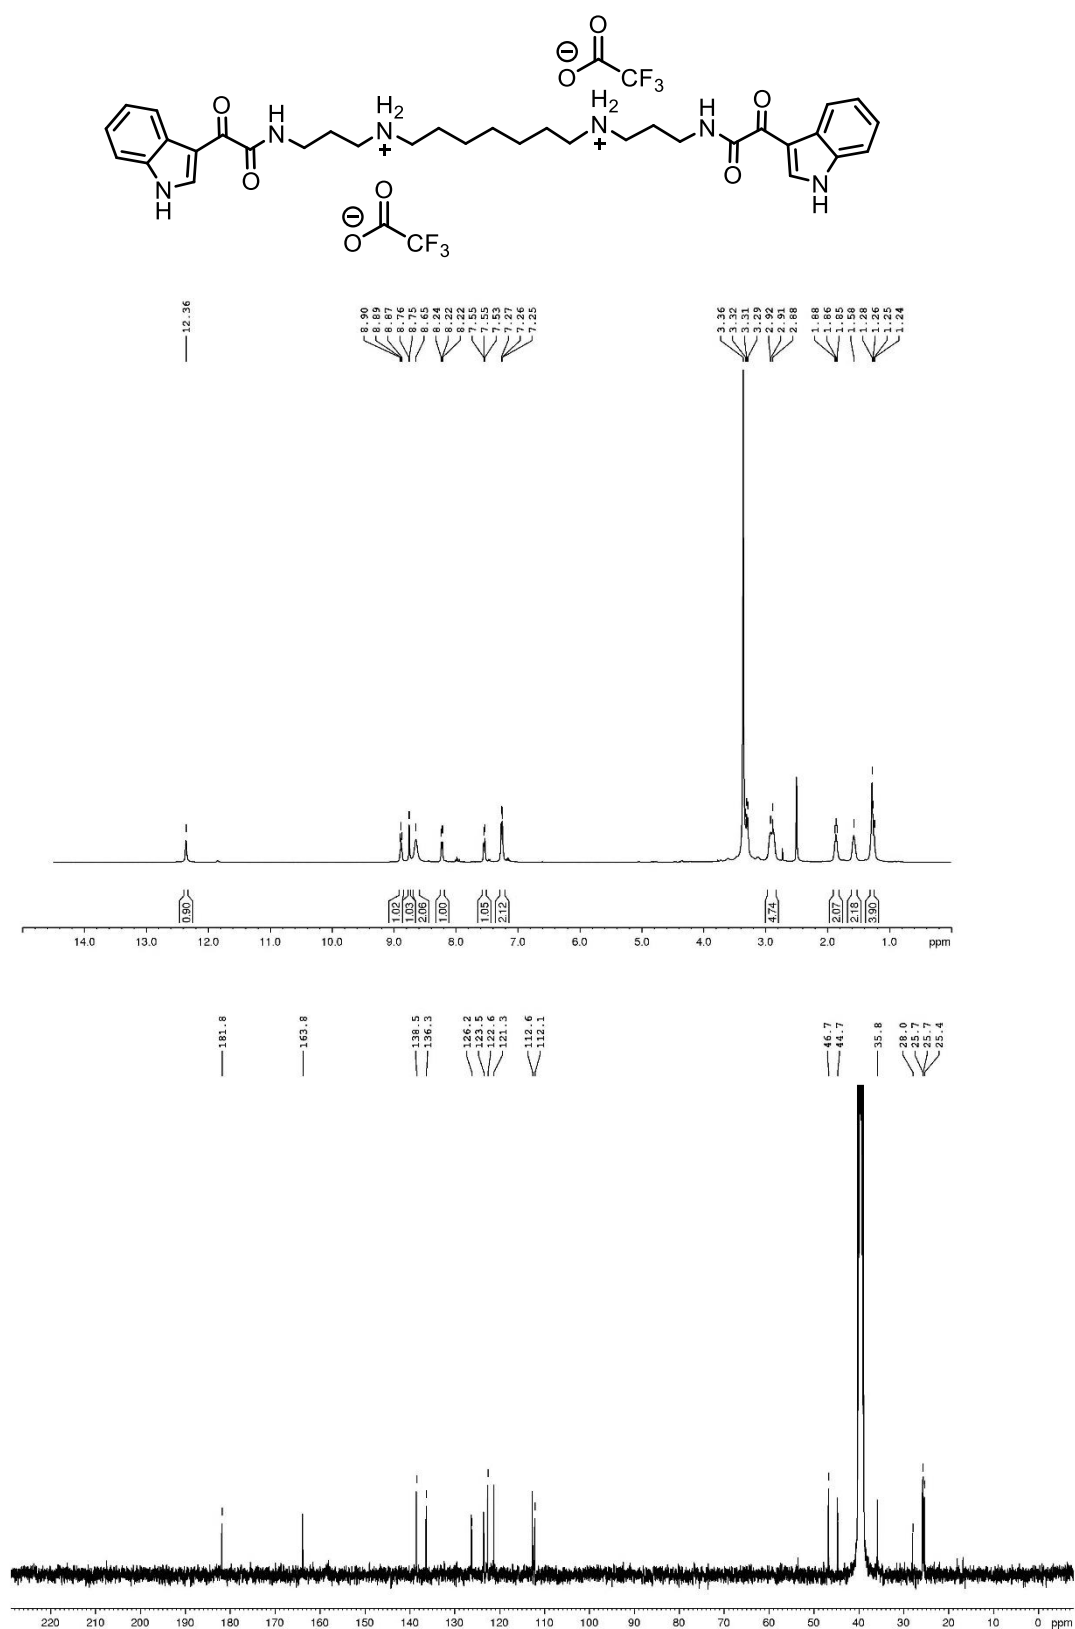

**Figure S3** <sup>1</sup>H (DMSO-*d*<sub>6</sub>, 400 MHz) and <sup>13</sup>C (DMSO-*d*<sub>6</sub>, 100 MHz) NMR spectra for **17b**

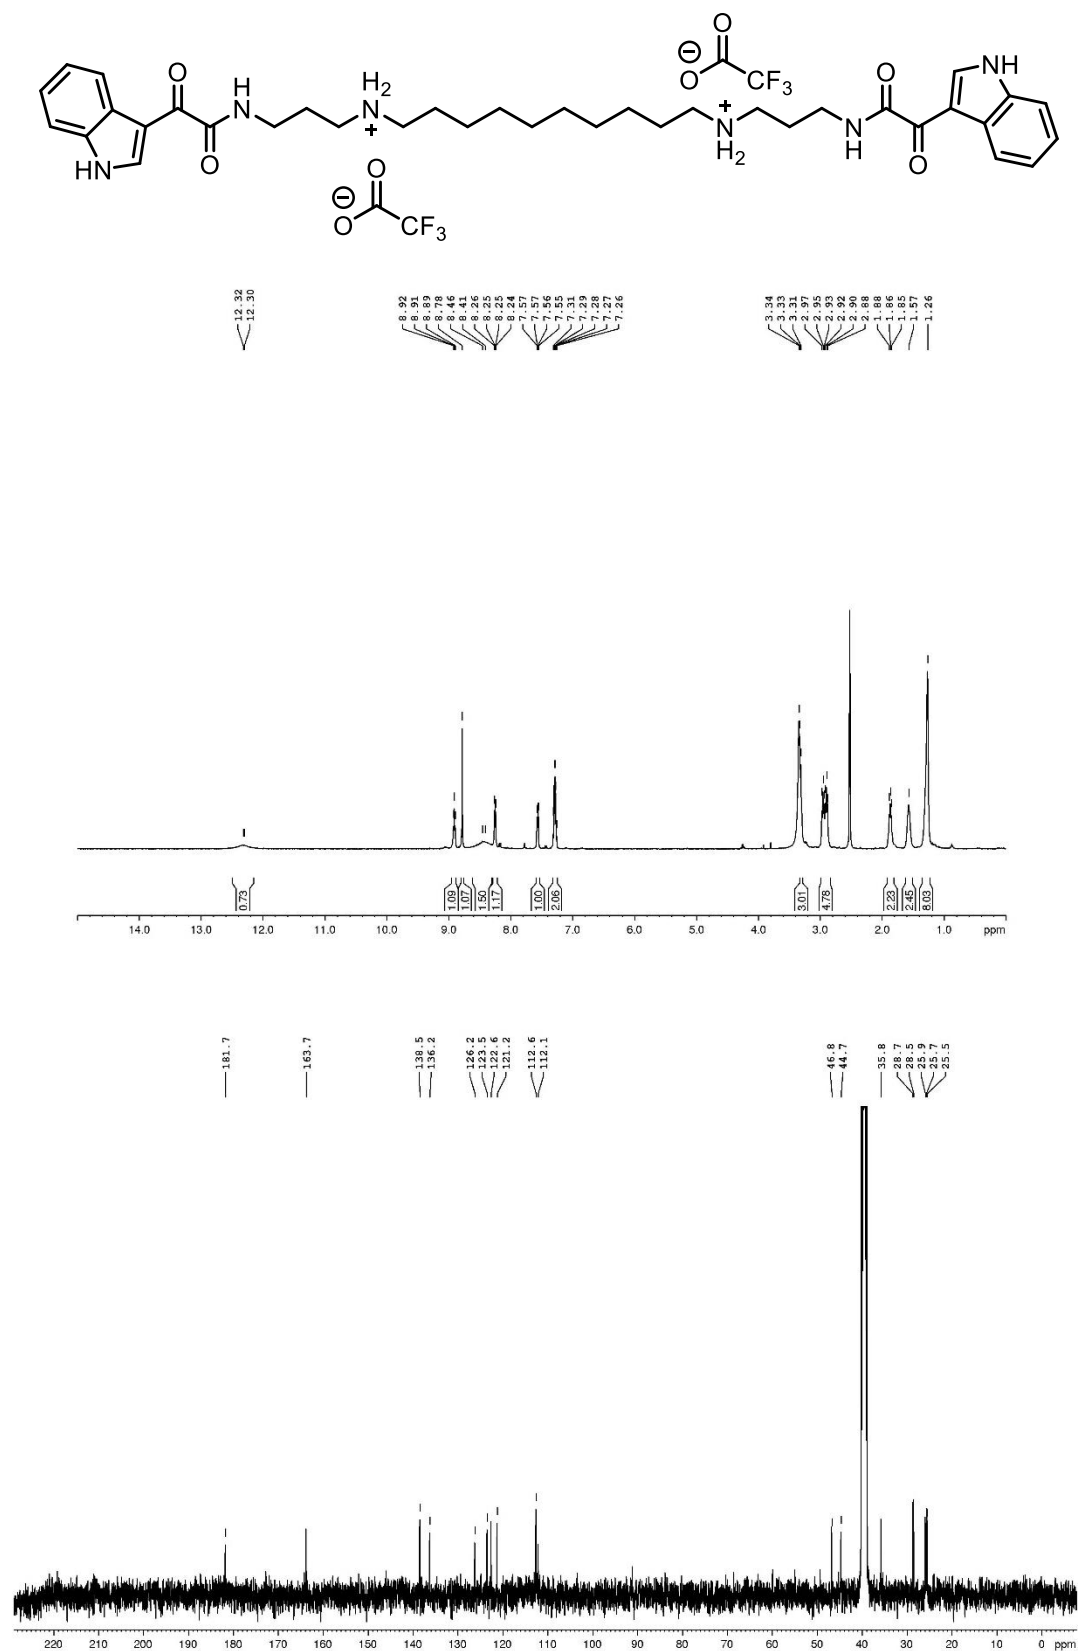

**Figure S4** <sup>1</sup>H (DMSO-*d*<sub>6</sub>, 400 MHz) and <sup>13</sup>C (DMSO-*d*<sub>6</sub>, 100 MHz) NMR spectra for **17d**

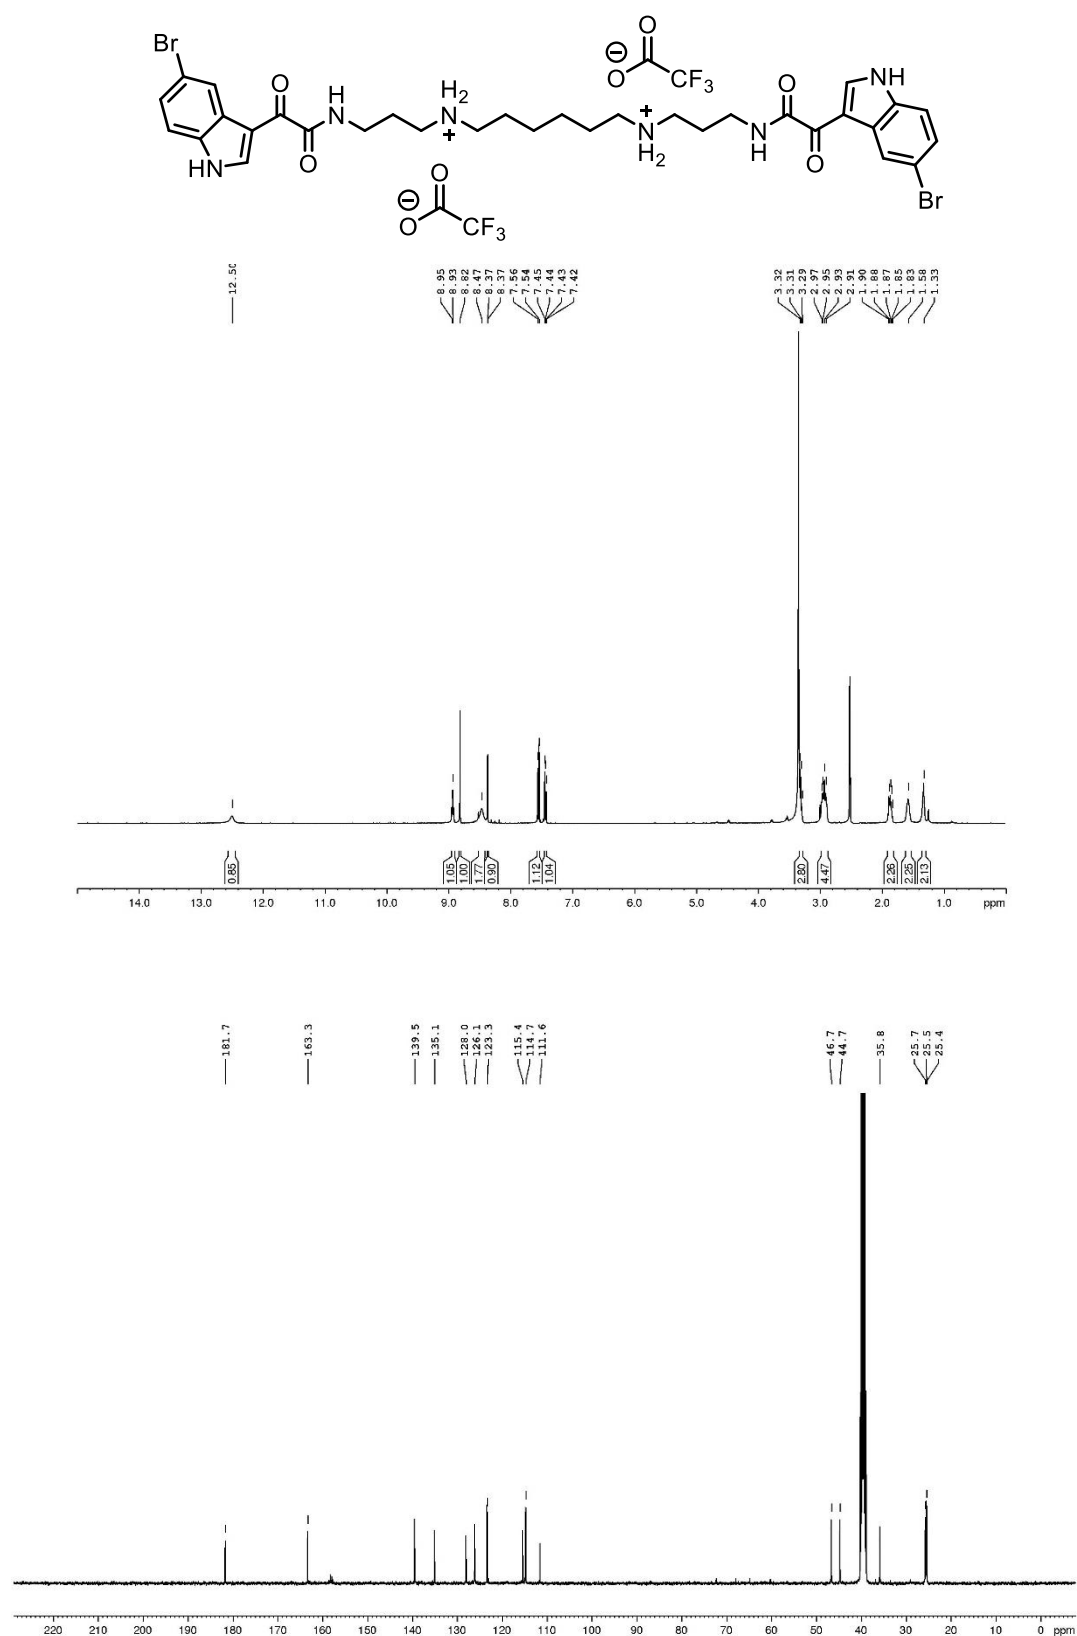

Figure S5 <sup>1</sup>H (DMSO-*d*<sub>6</sub>, 400 MHz) and <sup>13</sup>C (DMSO-*d*<sub>6</sub>, 100 MHz) NMR spectra for **18a**

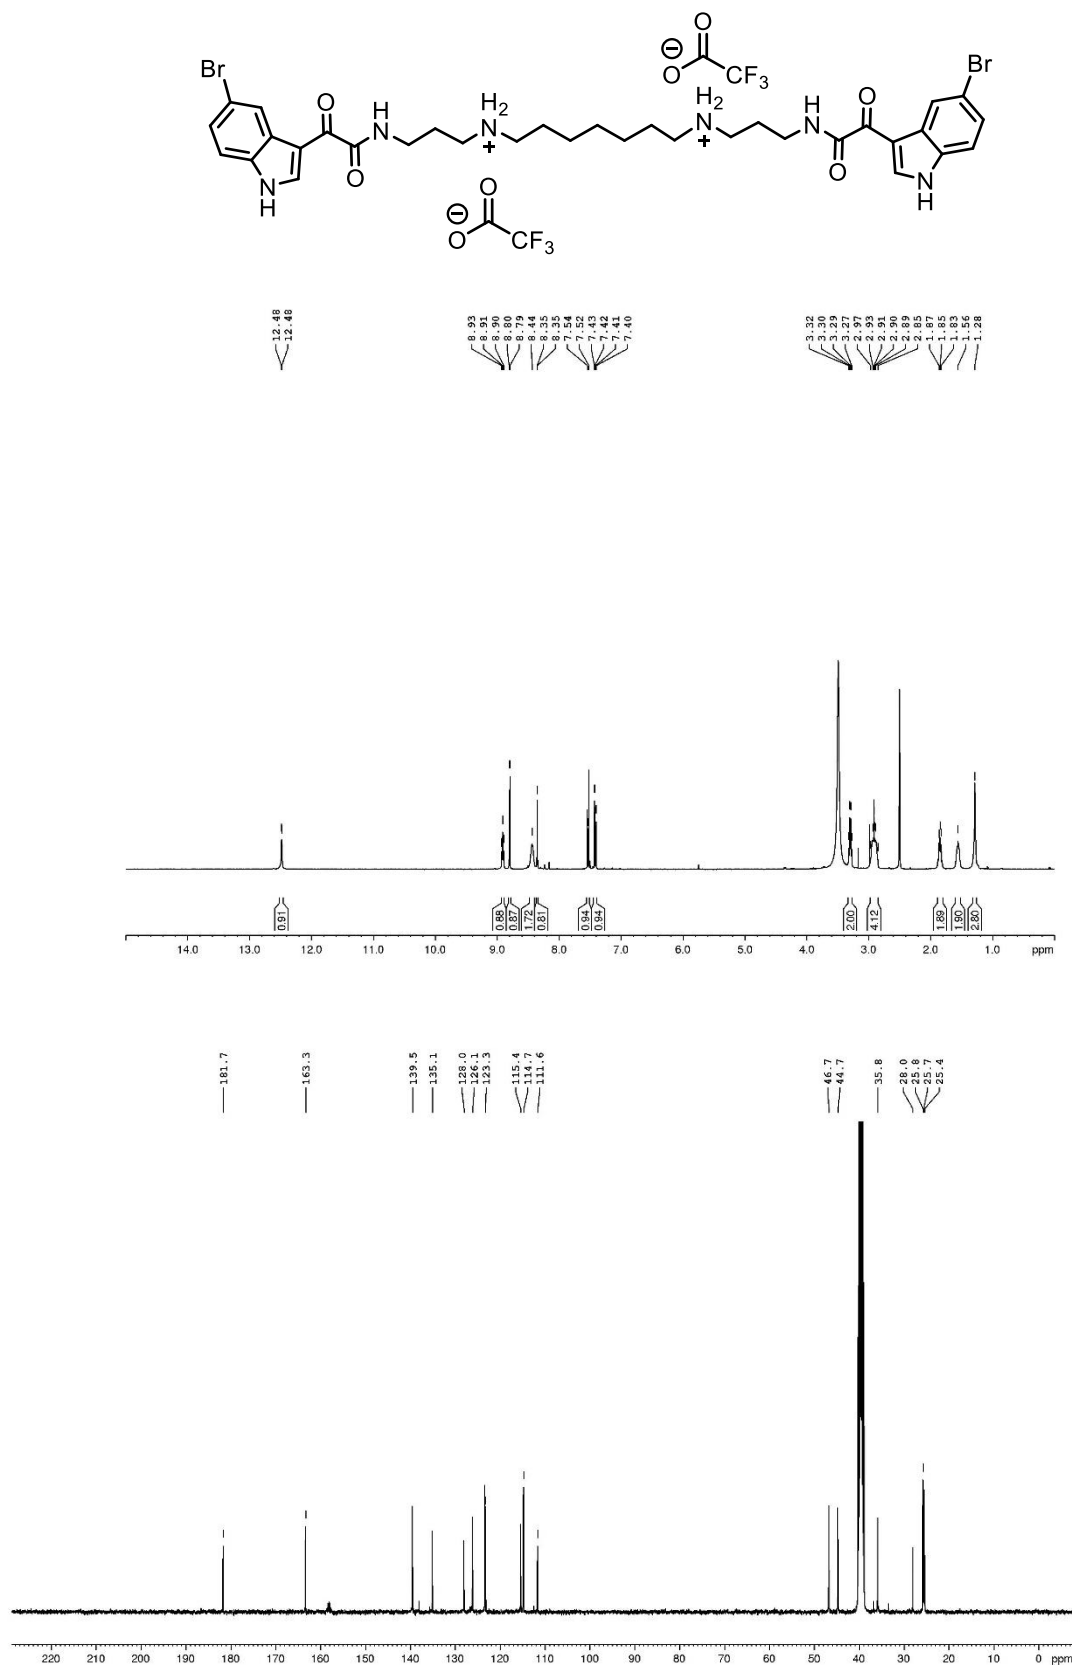

**Figure S6** <sup>1</sup>H (DMSO-d<sub>6</sub>, 400 MHz) and <sup>13</sup>C (DMSO-d<sub>6</sub>, 100 MHz) NMR spectra for **18b**

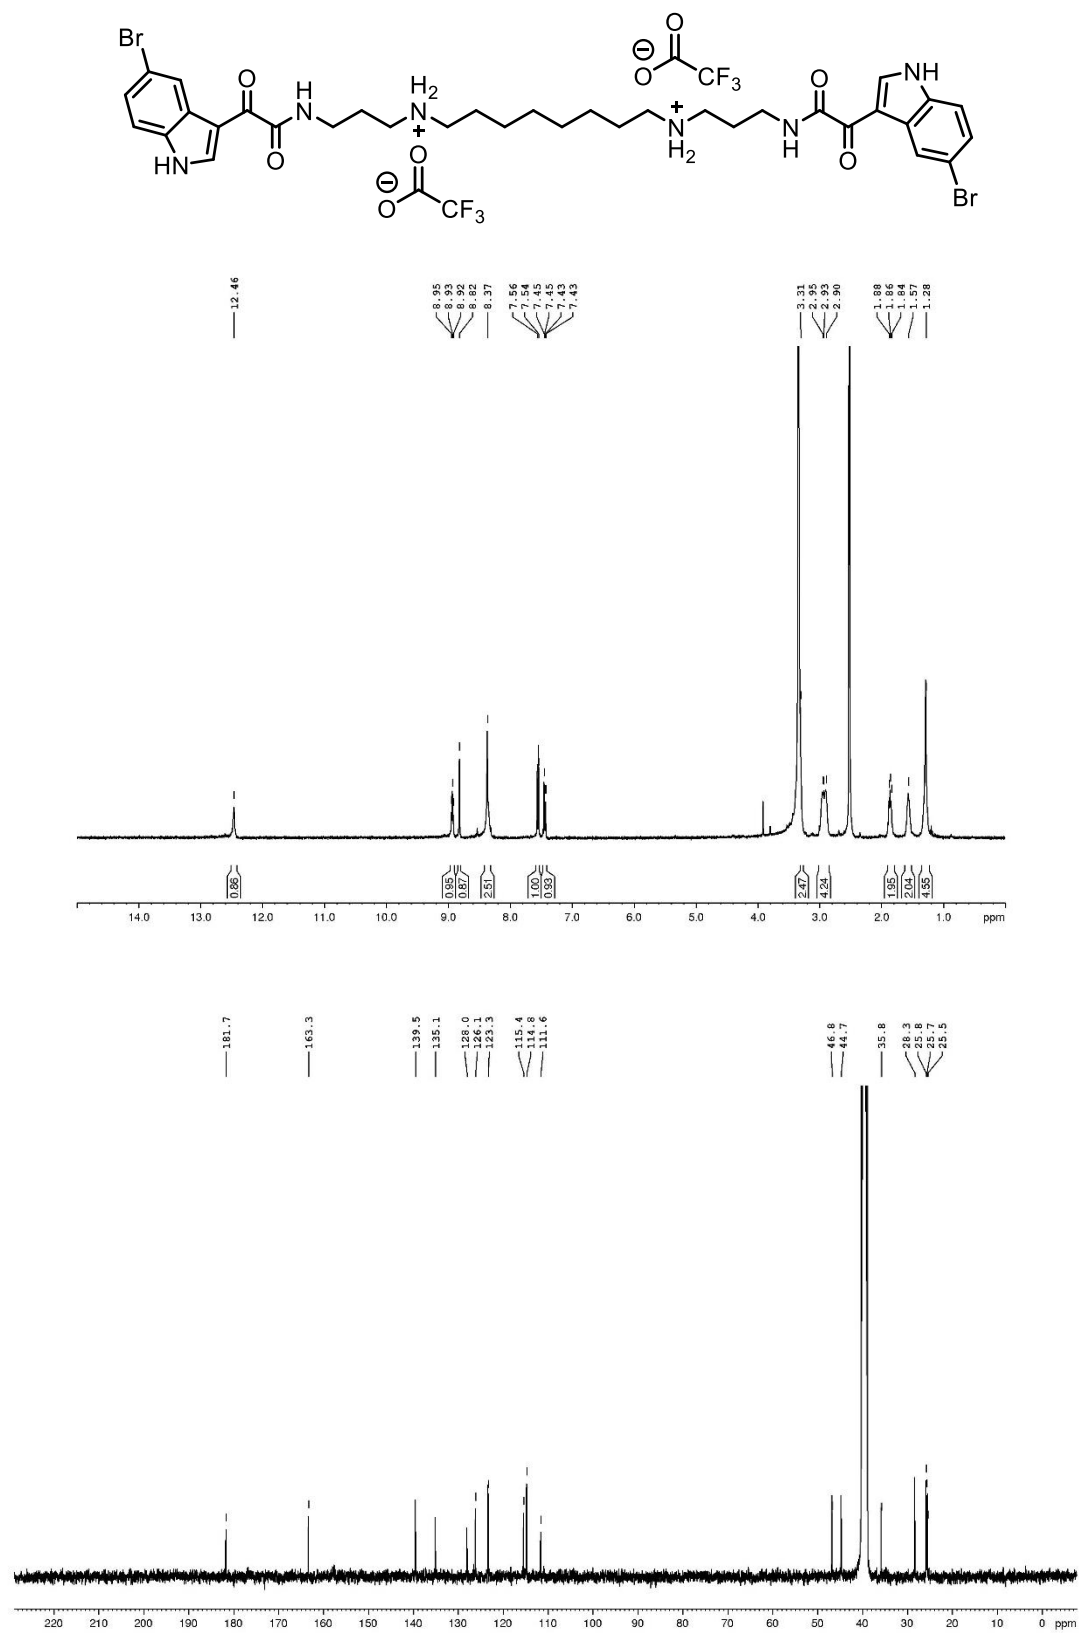

**Figure S7**  $^1\text{H}$  ( $\text{DMSO}-d_6$ , 400 MHz) and  $^{13}\text{C}$  ( $\text{DMSO}-d_6$ , 100 MHz) NMR spectra for **18c**

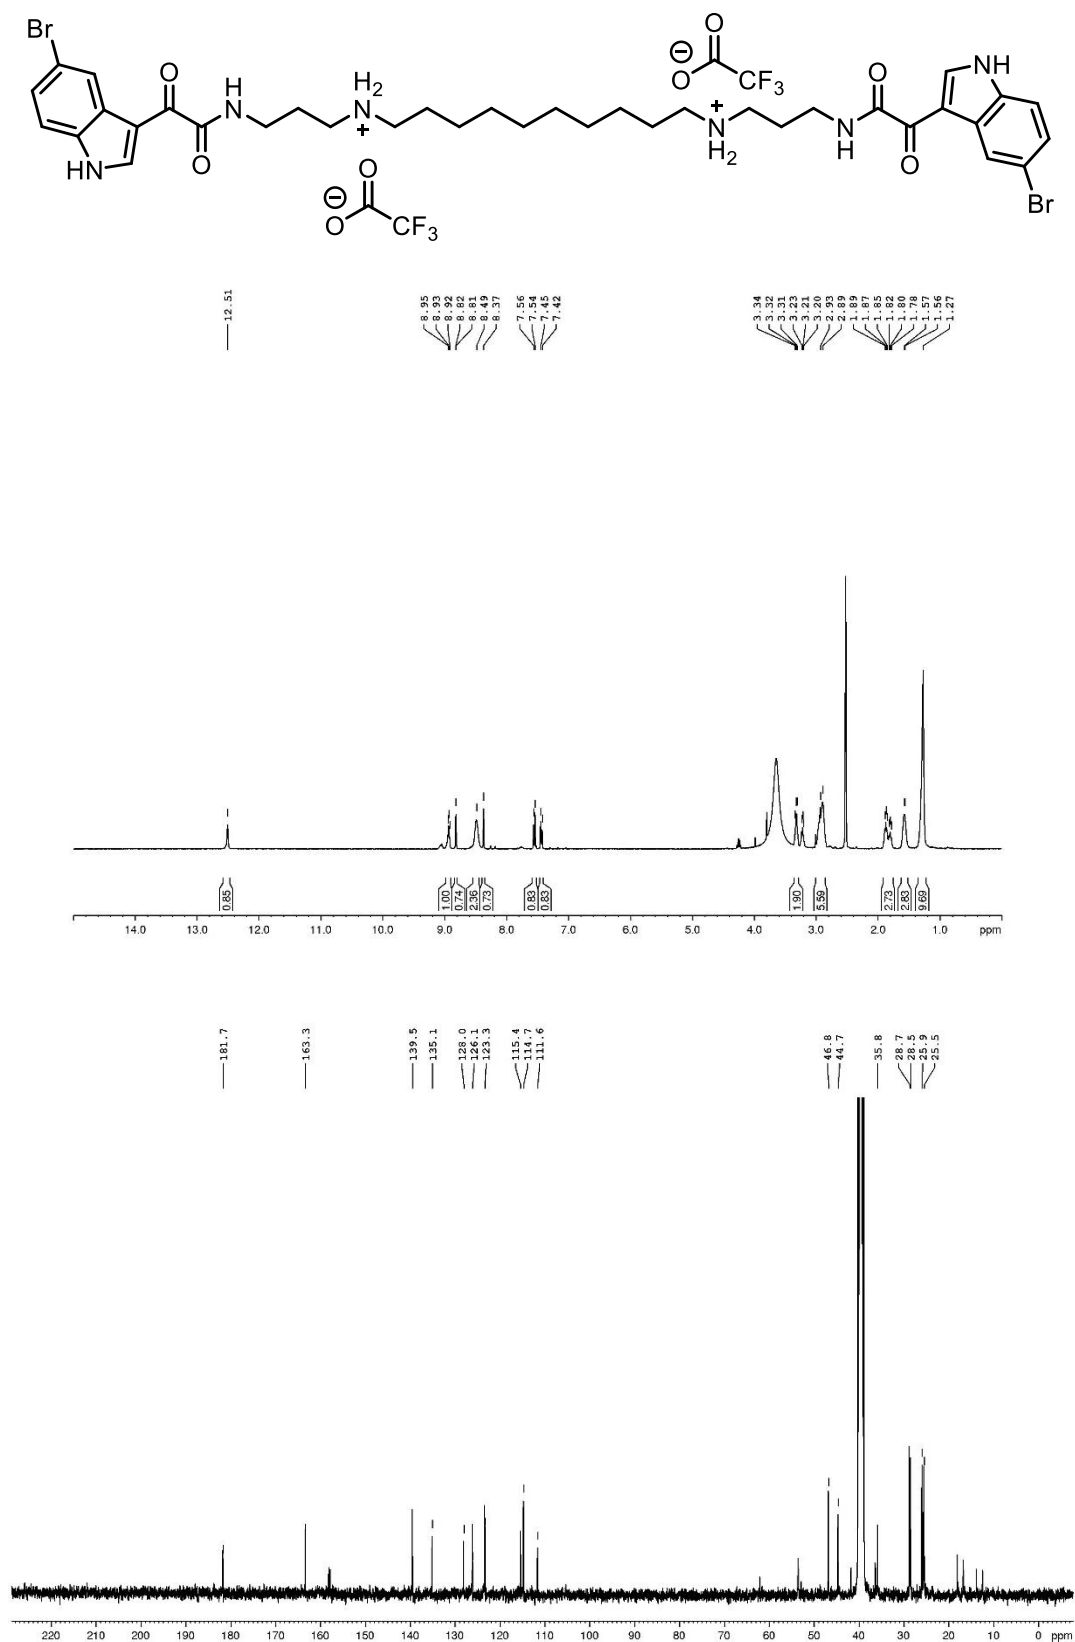

**Figure S8** <sup>1</sup>H (DMSO-d<sub>6</sub>, 400 MHz) and <sup>13</sup>C (DMSO-d<sub>6</sub>, 100 MHz) NMR spectra for **18d**

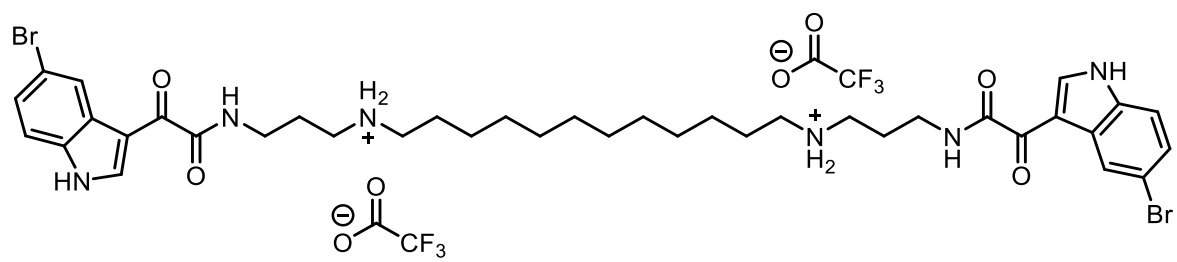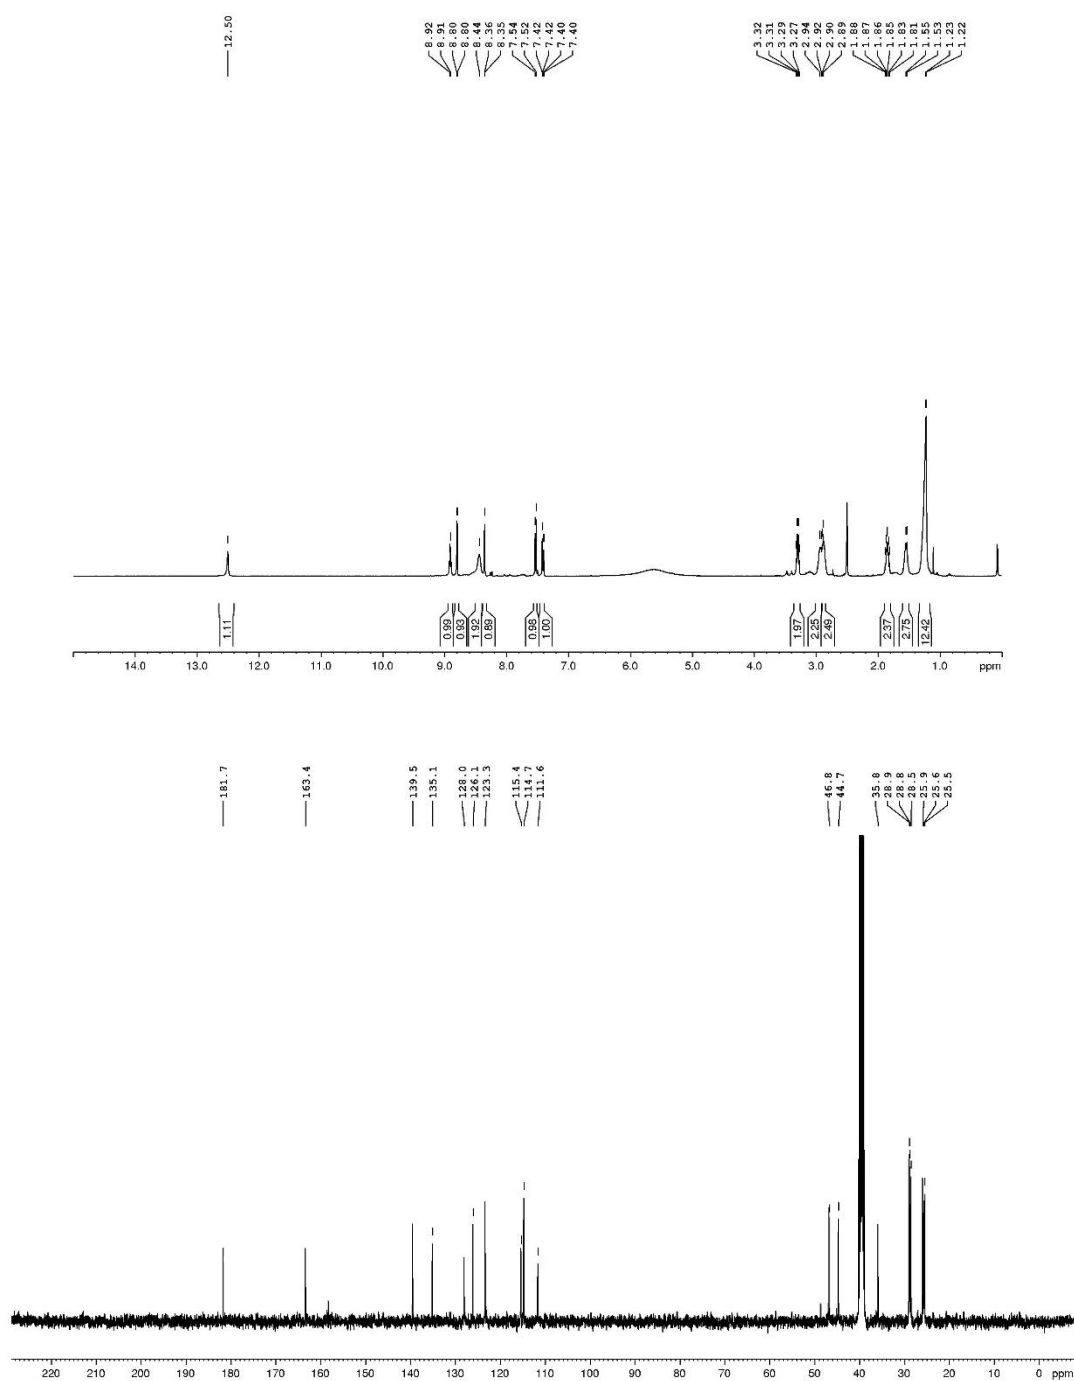

**Figure S9** <sup>1</sup>H (DMSO-*d*<sub>6</sub>, 400 MHz) and <sup>13</sup>C (DMSO-*d*<sub>6</sub>, 100 MHz) NMR spectra for **18e**

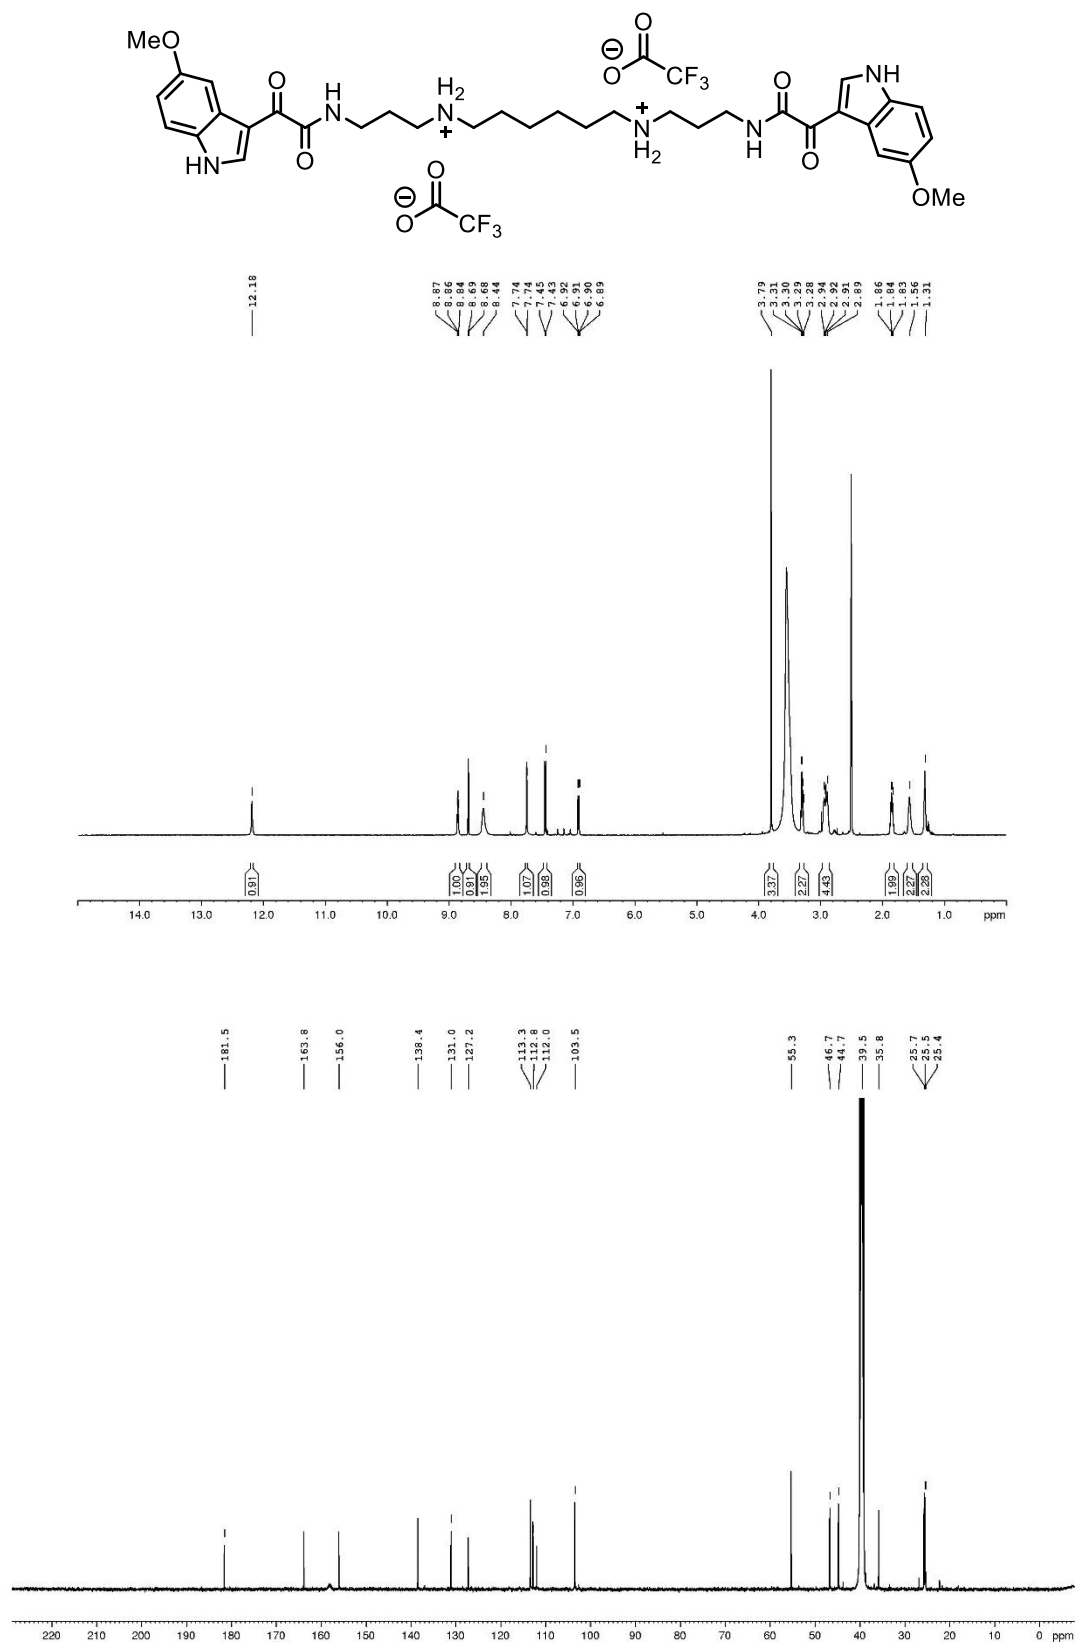

**Figure S10** <sup>1</sup>H (DMSO-*d*<sub>6</sub>, 500 MHz) and <sup>13</sup>C (DMSO-*d*<sub>6</sub>, 125 MHz) NMR spectra for **19a**

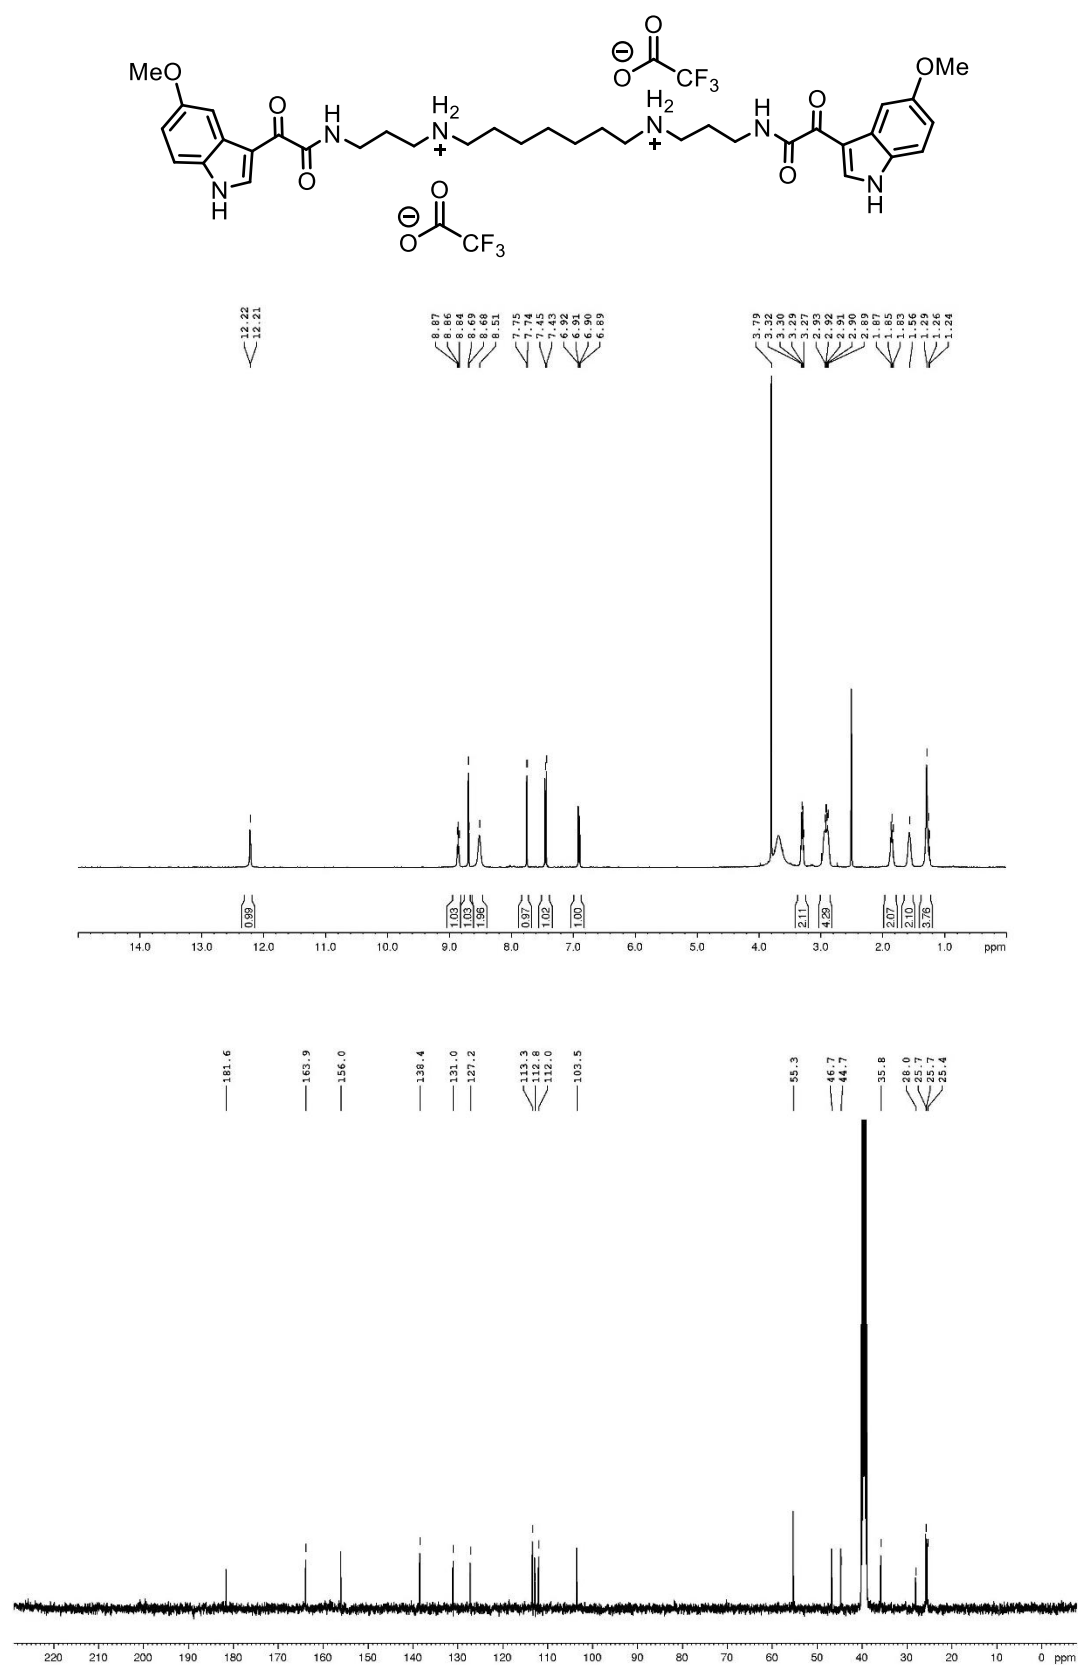

**Figure S11** <sup>1</sup>H (DMSO-d<sub>6</sub>, 400 MHz) and <sup>13</sup>C (DMSO-d<sub>6</sub>, 100 MHz) NMR spectra for **19b**

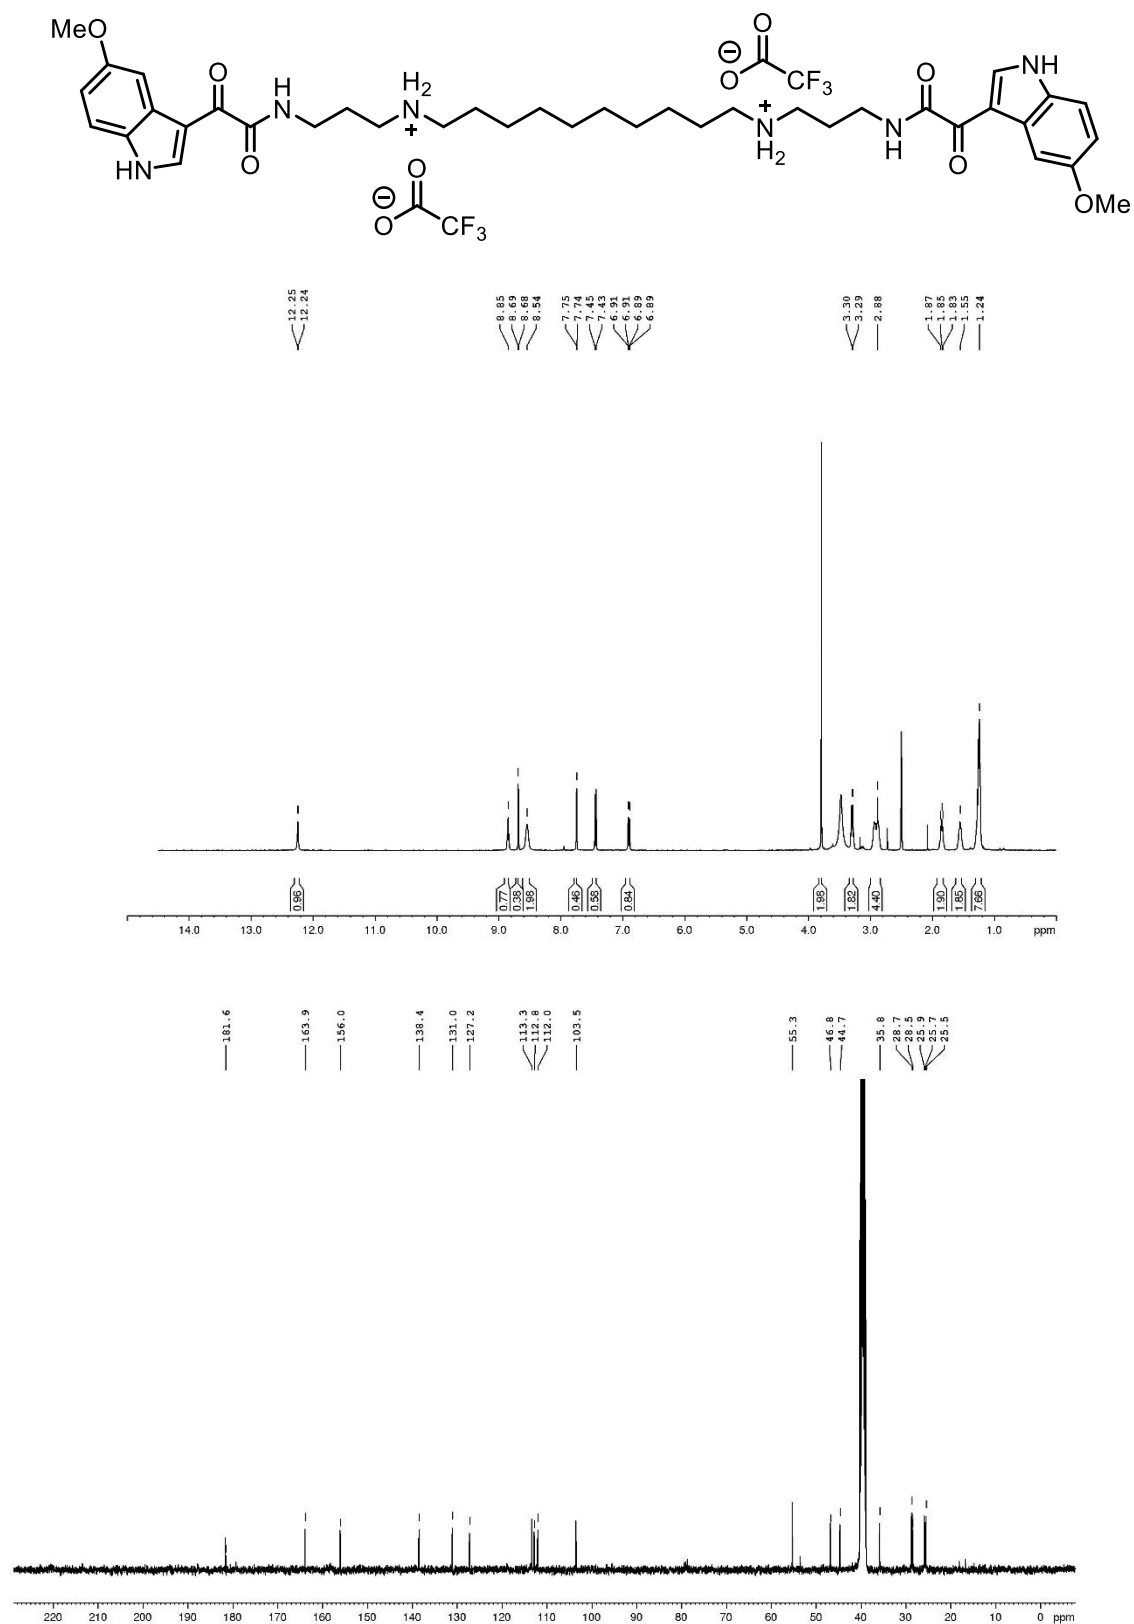

**Figure S12** <sup>1</sup>H (DMSO-d<sub>6</sub>, 400 MHz) and <sup>13</sup>C (DMSO-d<sub>6</sub>, 100 MHz) NMR spectra for **19d**

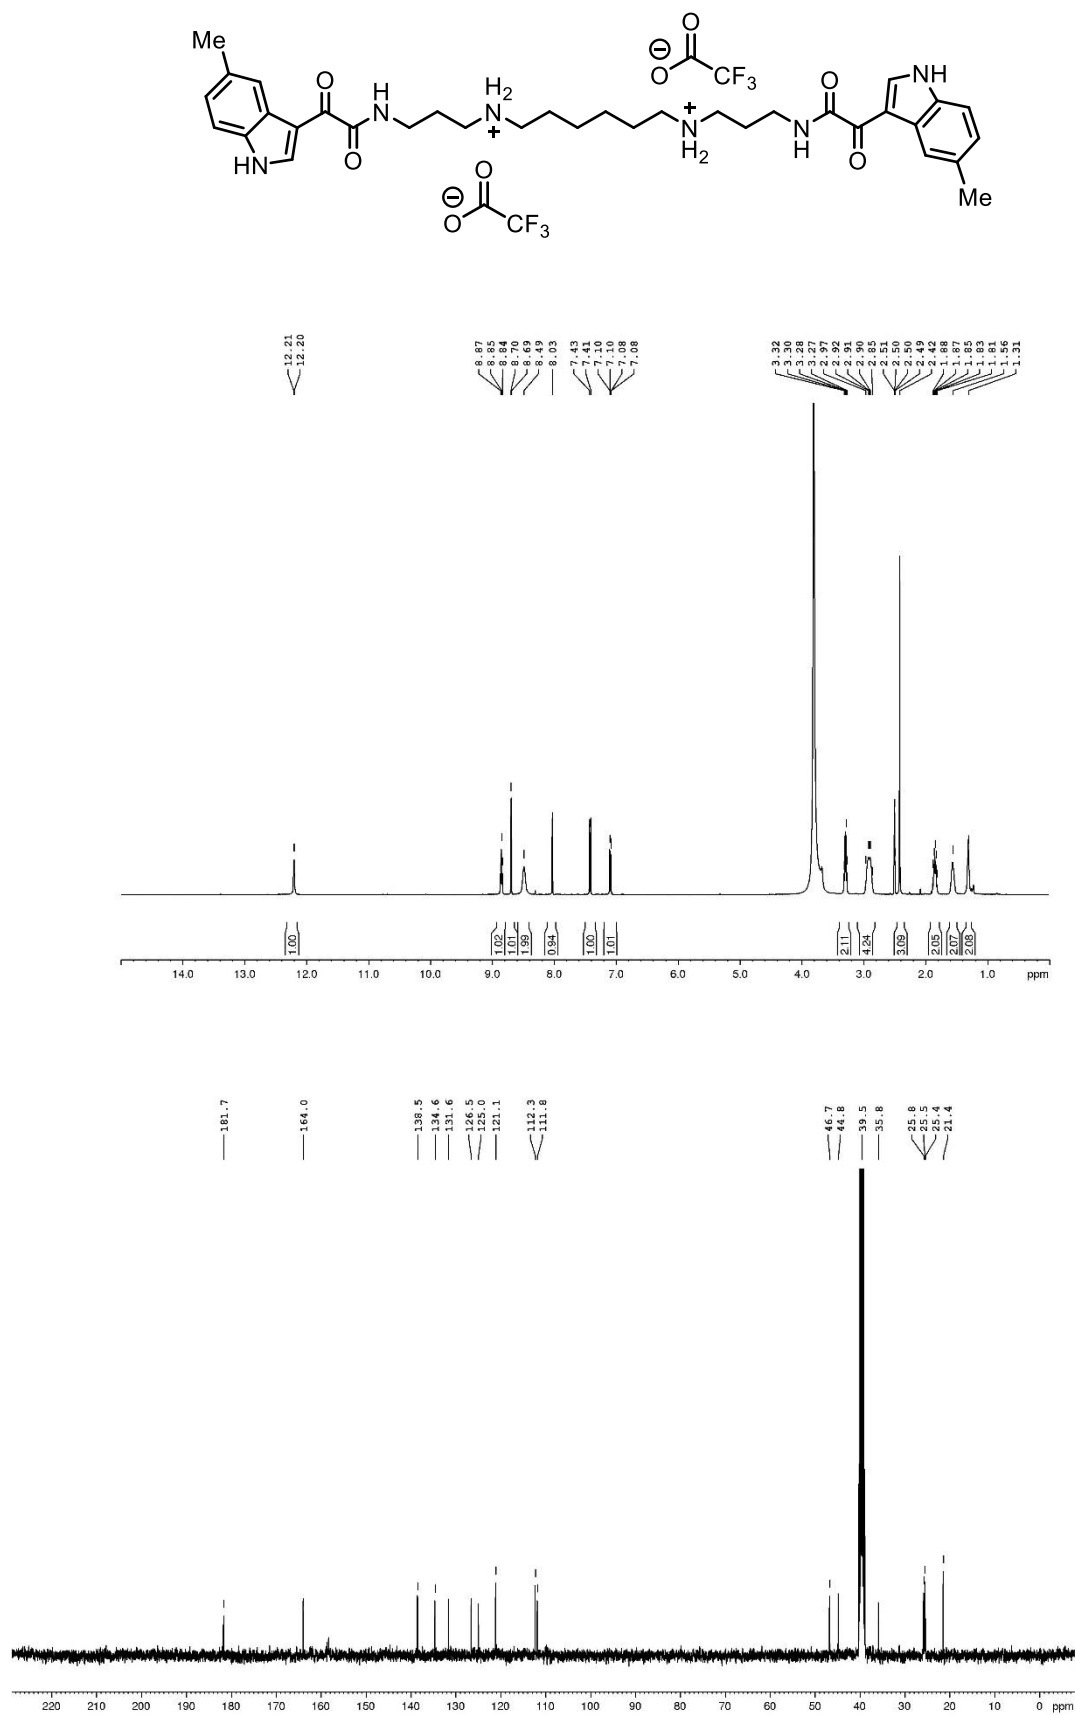

**Figure S13** <sup>1</sup>H (DMSO-d<sub>6</sub>, 400 MHz) and <sup>13</sup>C (DMSO-d<sub>6</sub>, 100 MHz) NMR spectra for **20a**

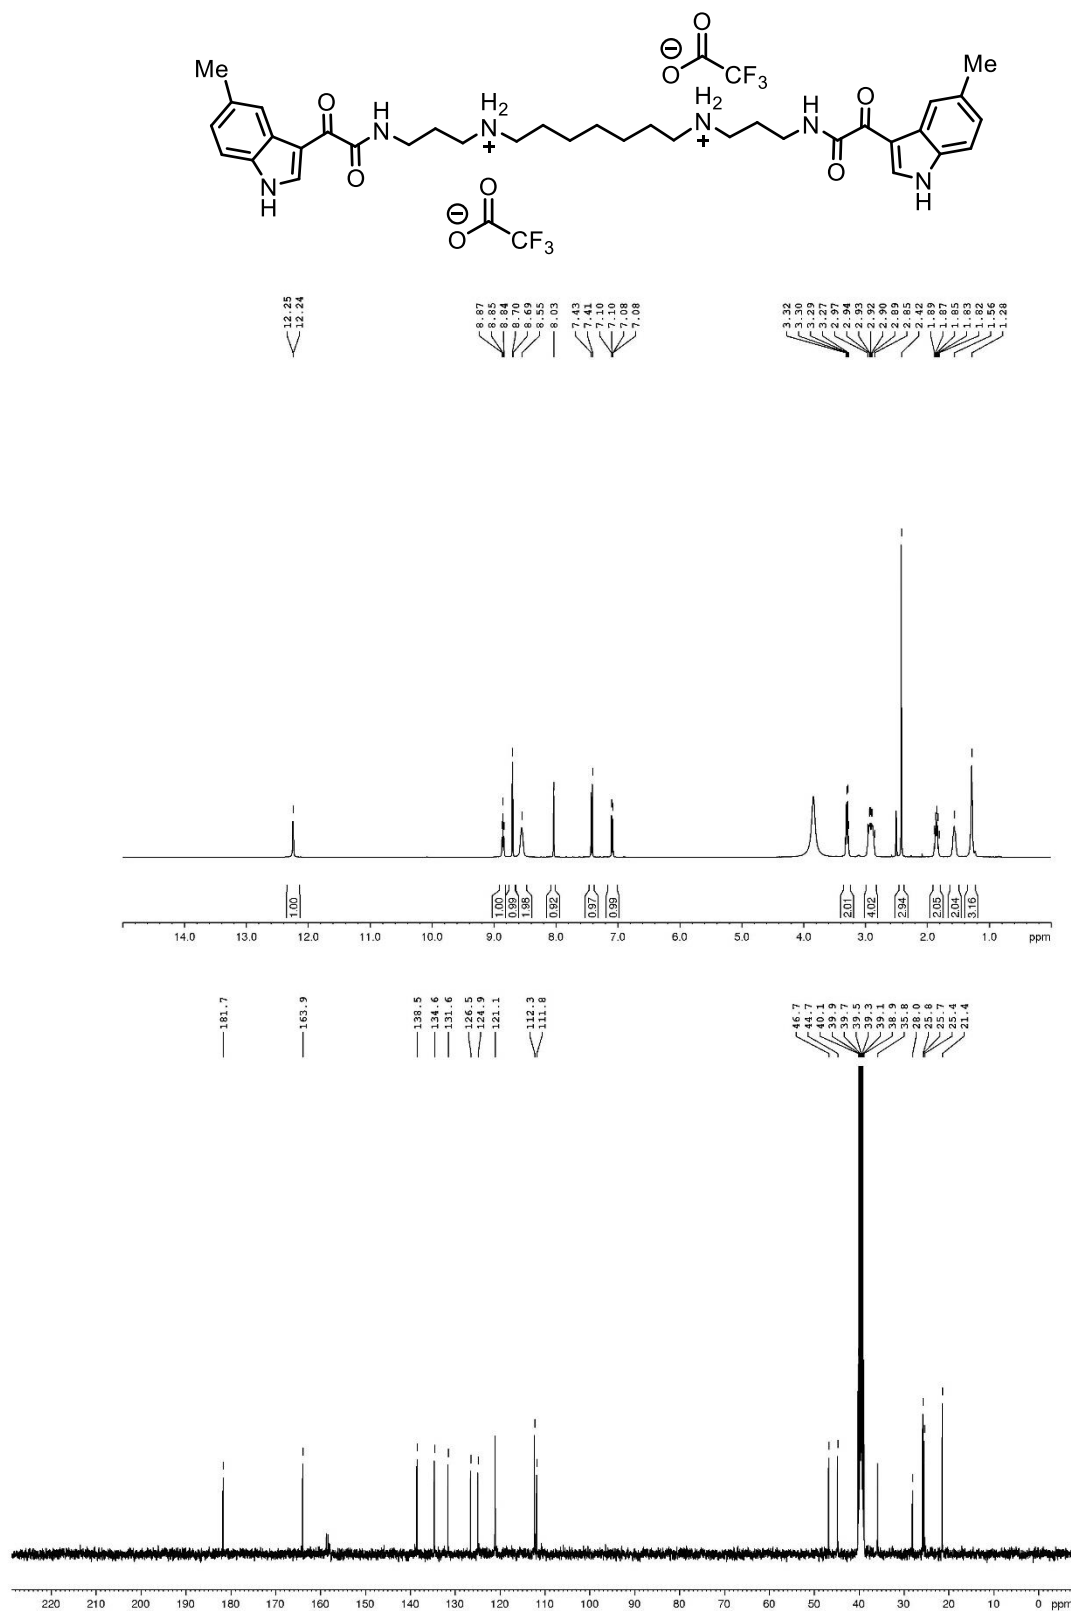

**Figure S14** <sup>1</sup>H (DMSO-*d*<sub>6</sub>, 400 MHz) and <sup>13</sup>C (DMSO-*d*<sub>6</sub>, 100 MHz) NMR spectra for **20b**

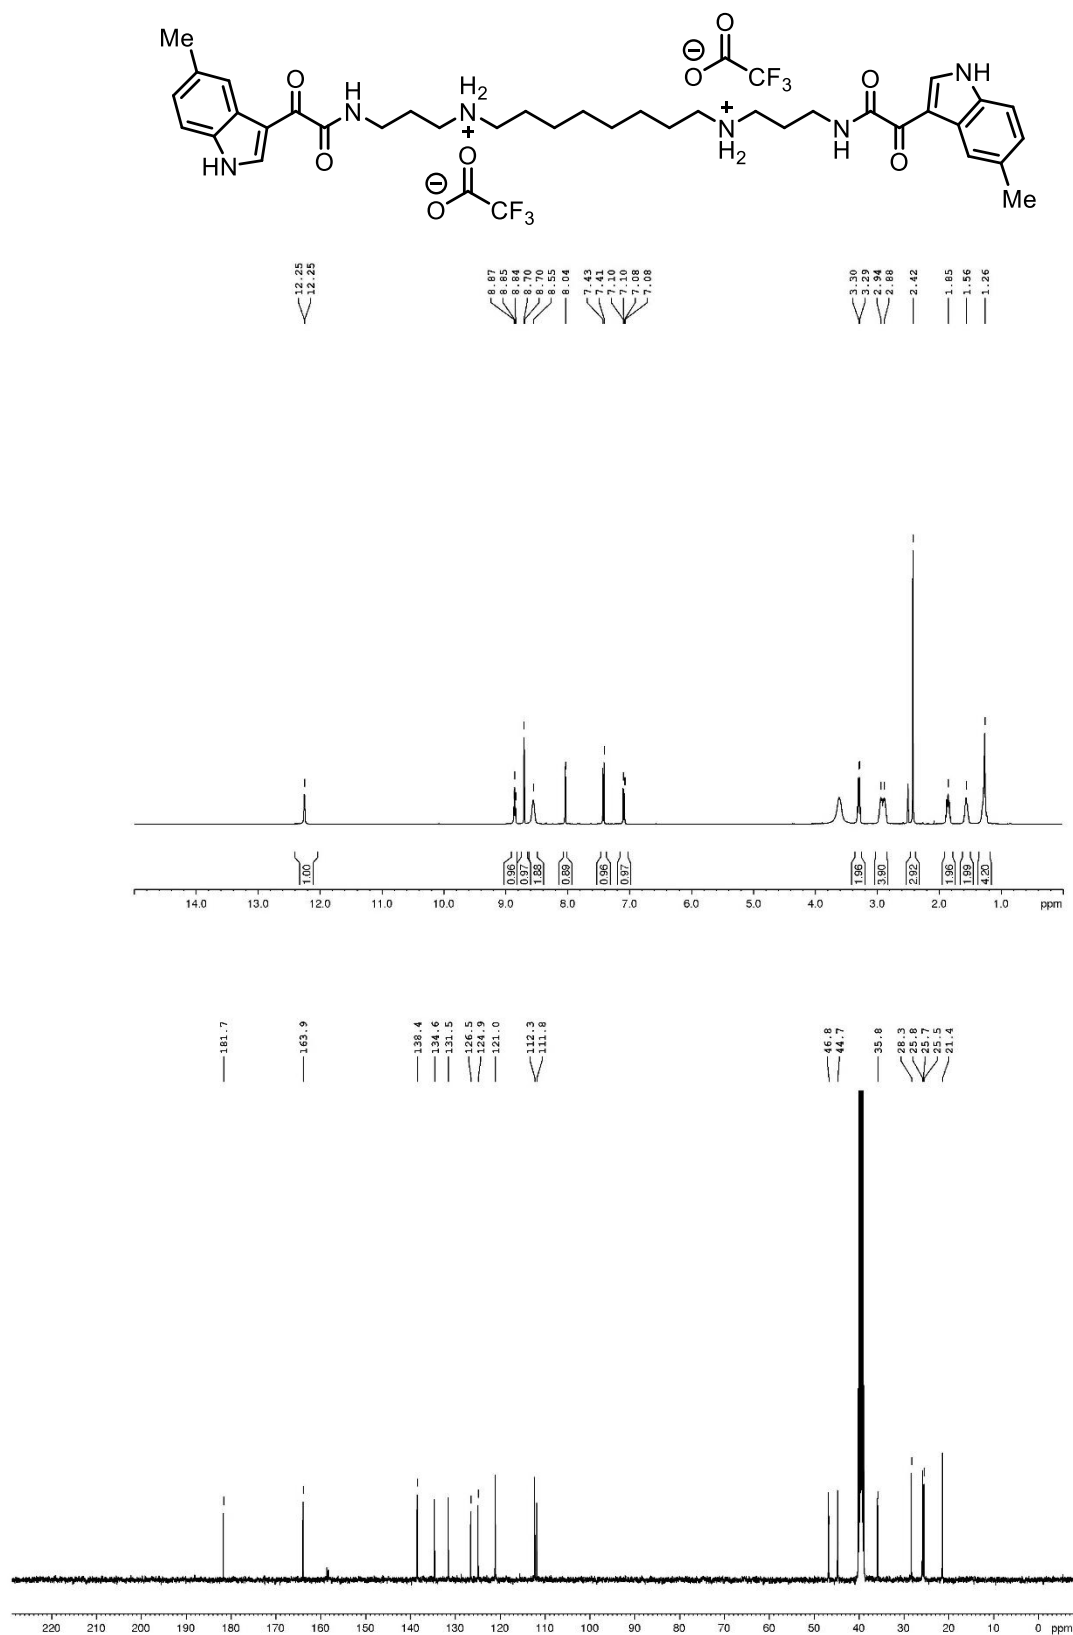

**Figure S15**  $^1\text{H}$  (DMSO- $d_6$ , 400 MHz) and  $^{13}\text{C}$  (DMSO- $d_6$ , 100 MHz) NMR spectra for **20c**

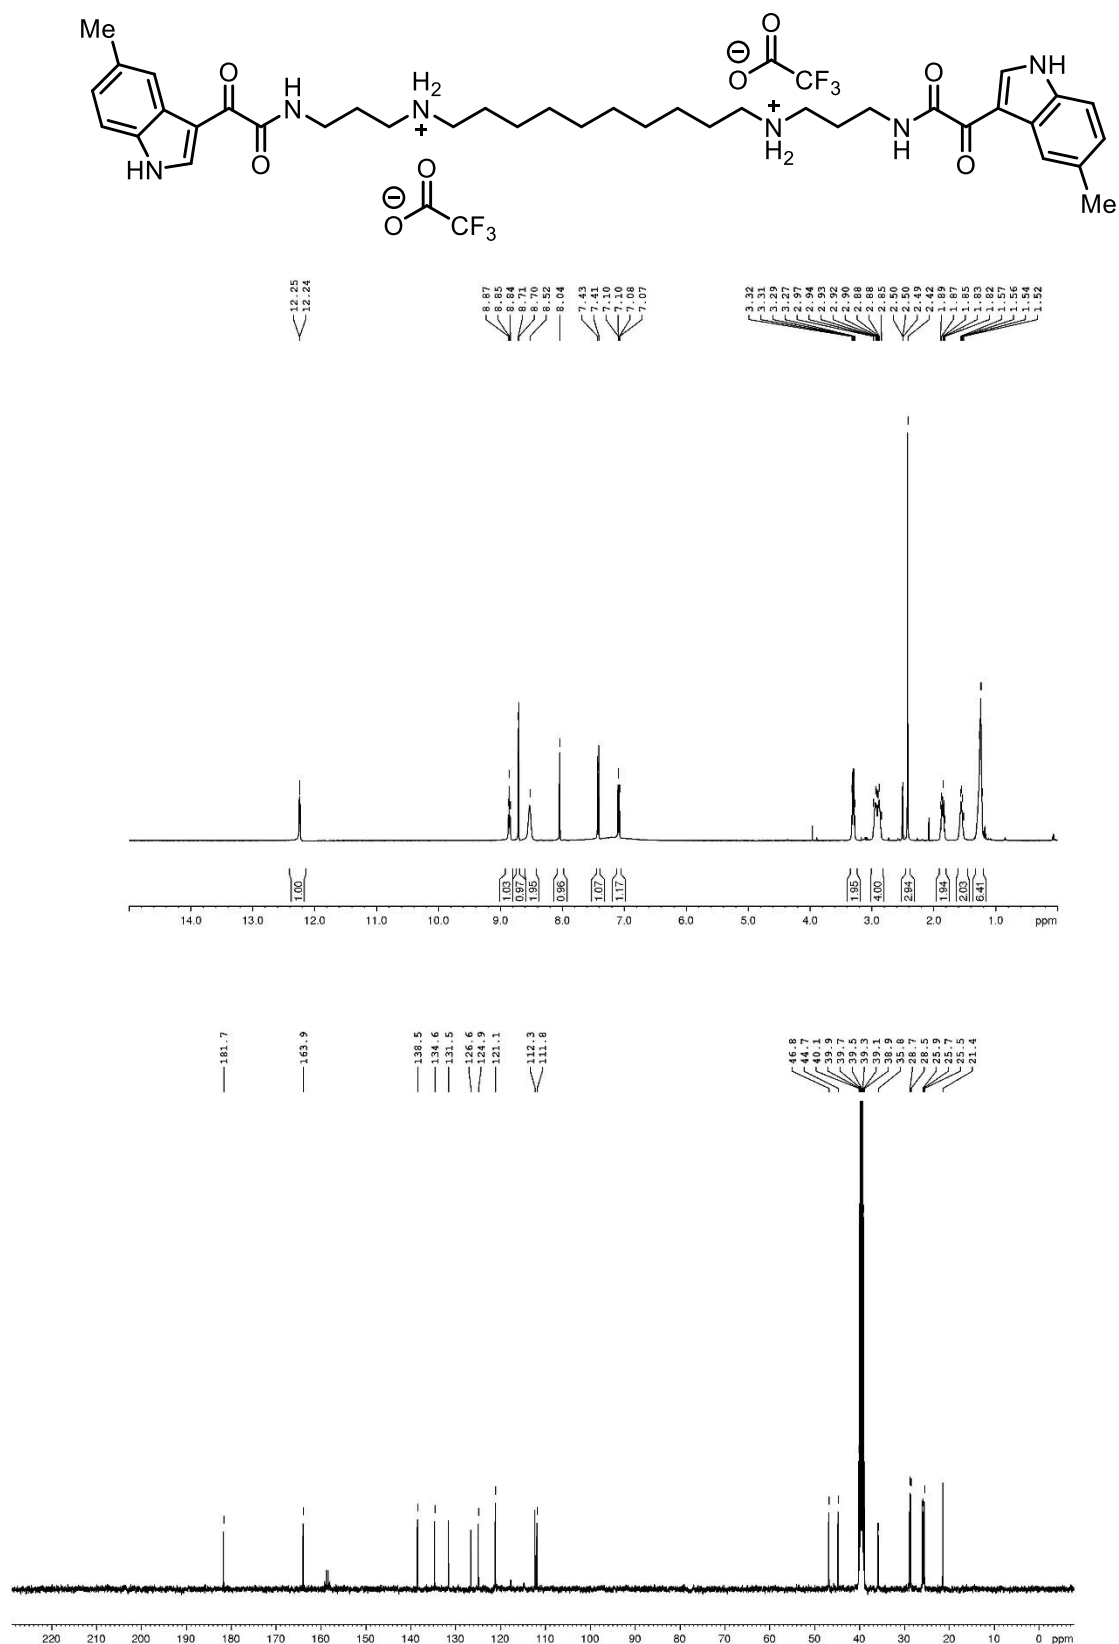

**Figure S16** <sup>1</sup>H (DMSO-*d*<sub>6</sub>, 400 MHz) and <sup>13</sup>C (DMSO-*d*<sub>6</sub>, 100 MHz) NMR spectra for **20d**



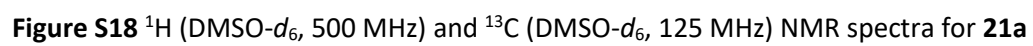

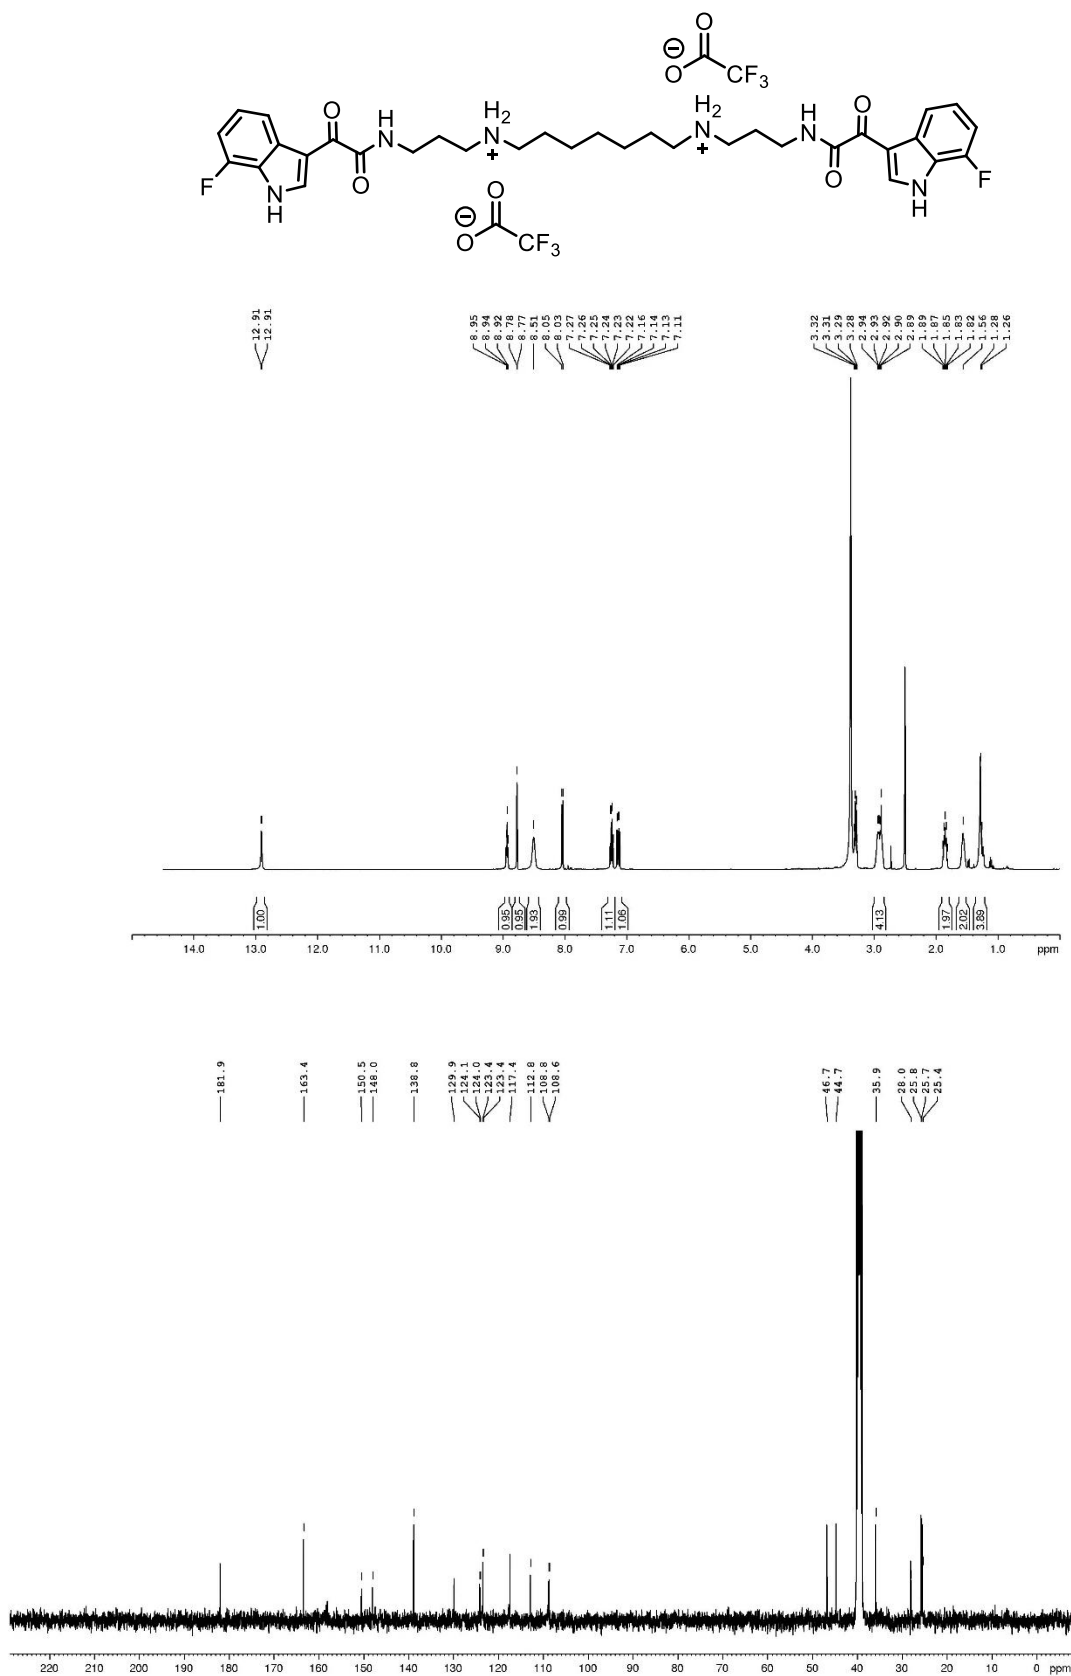

**Figure S19** <sup>1</sup>H (DMSO-d<sub>6</sub>, 400 MHz) and <sup>13</sup>C (DMSO-d<sub>6</sub>, 100 MHz) NMR spectra for **21b**

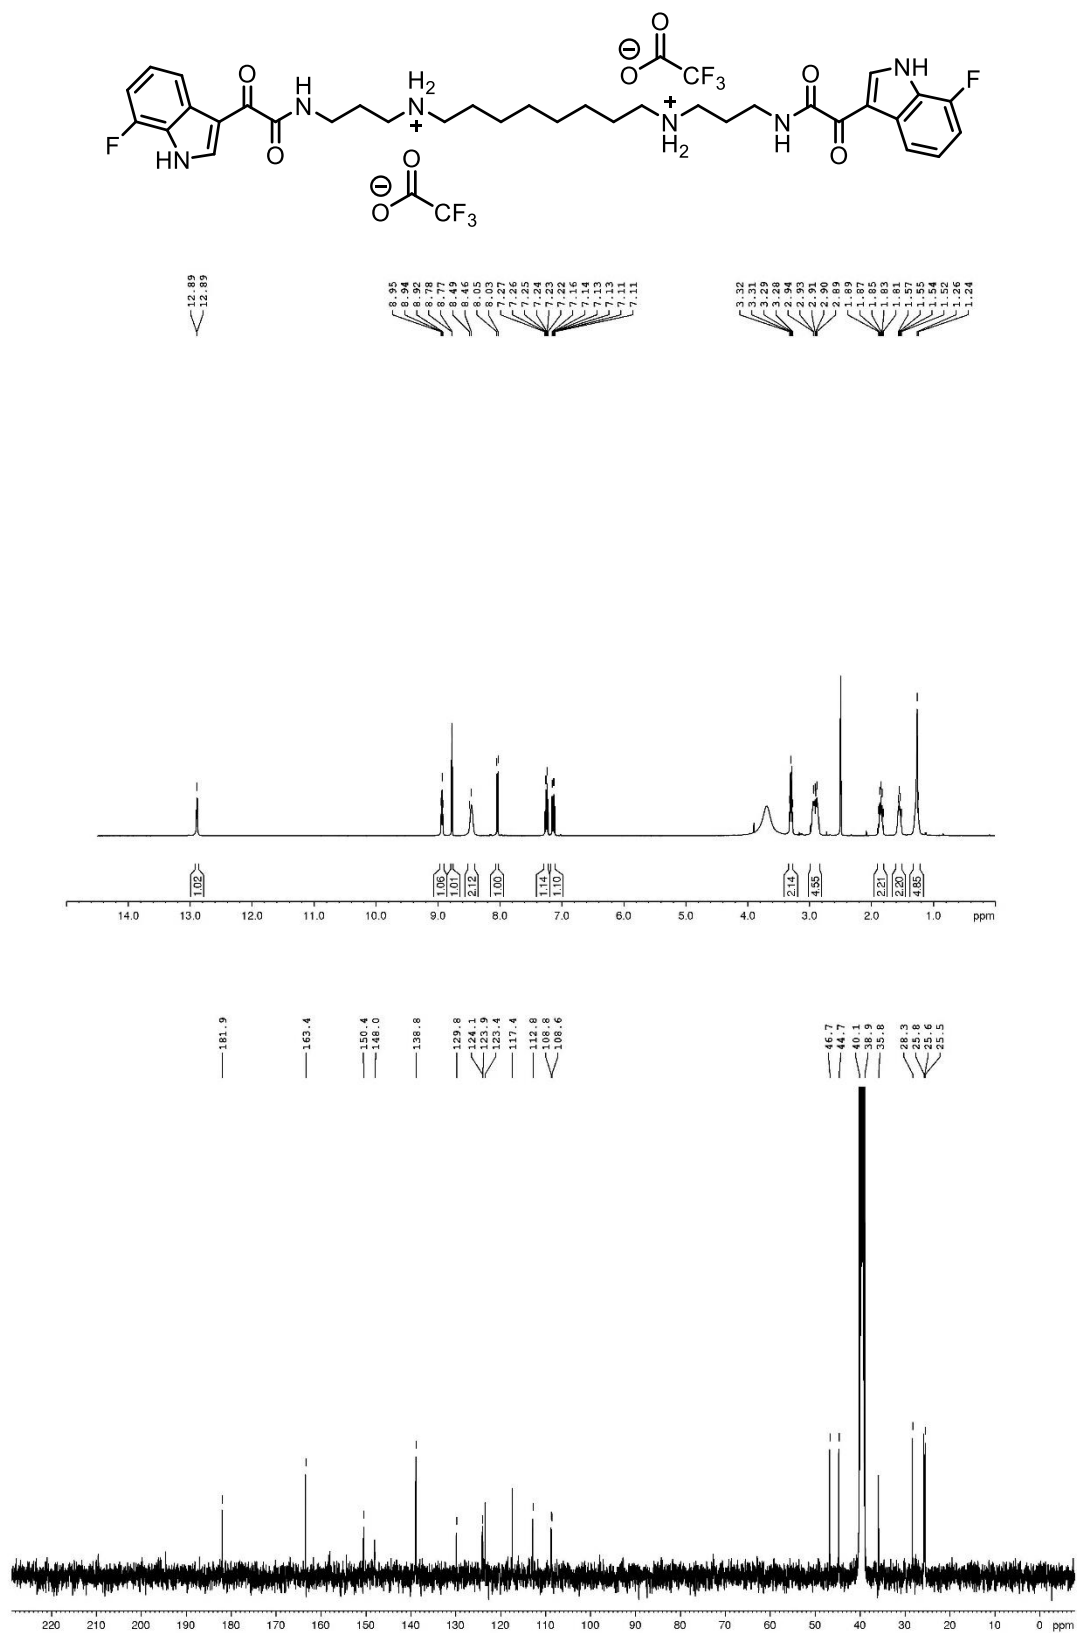

**Figure S20** <sup>1</sup>H (DMSO-*d*<sub>6</sub>, 400 MHz) and <sup>13</sup>C (DMSO-*d*<sub>6</sub>, 100 MHz) NMR spectra for **21c**

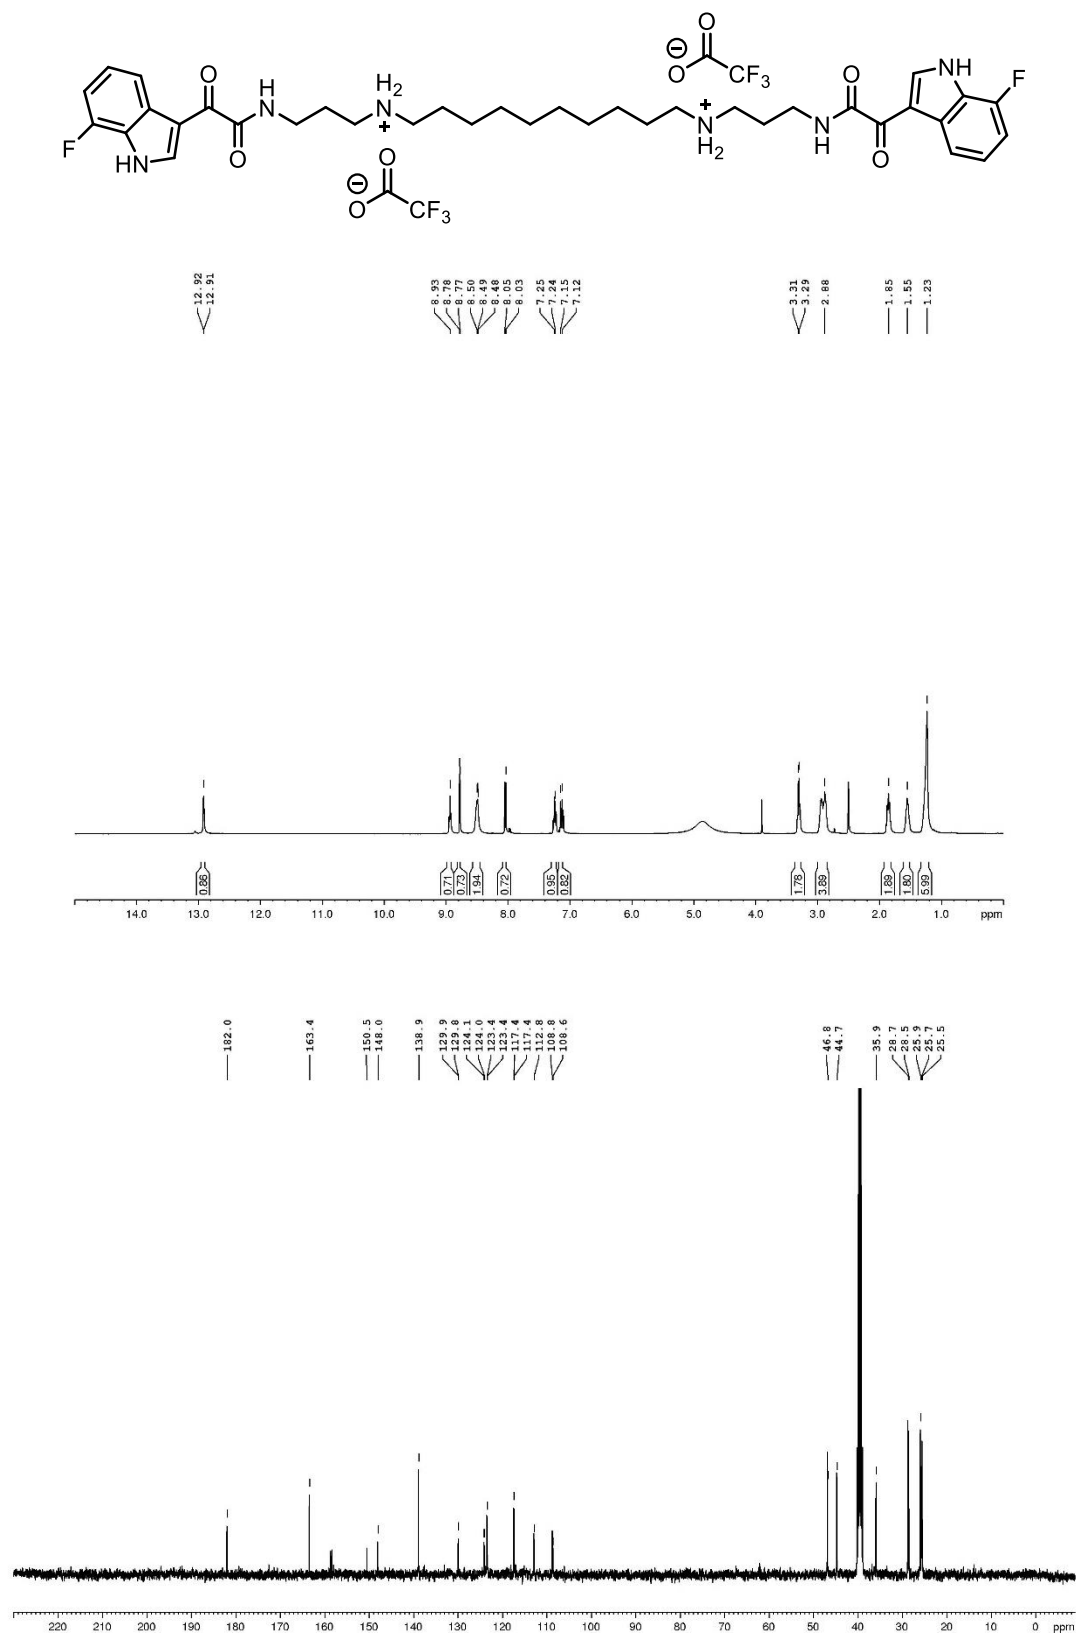

Figure S21 <sup>1</sup>H (DMSO-*d*<sub>6</sub>, 400 MHz) and <sup>13</sup>C (DMSO-*d*<sub>6</sub>, 100 MHz) NMR spectra for **21d**

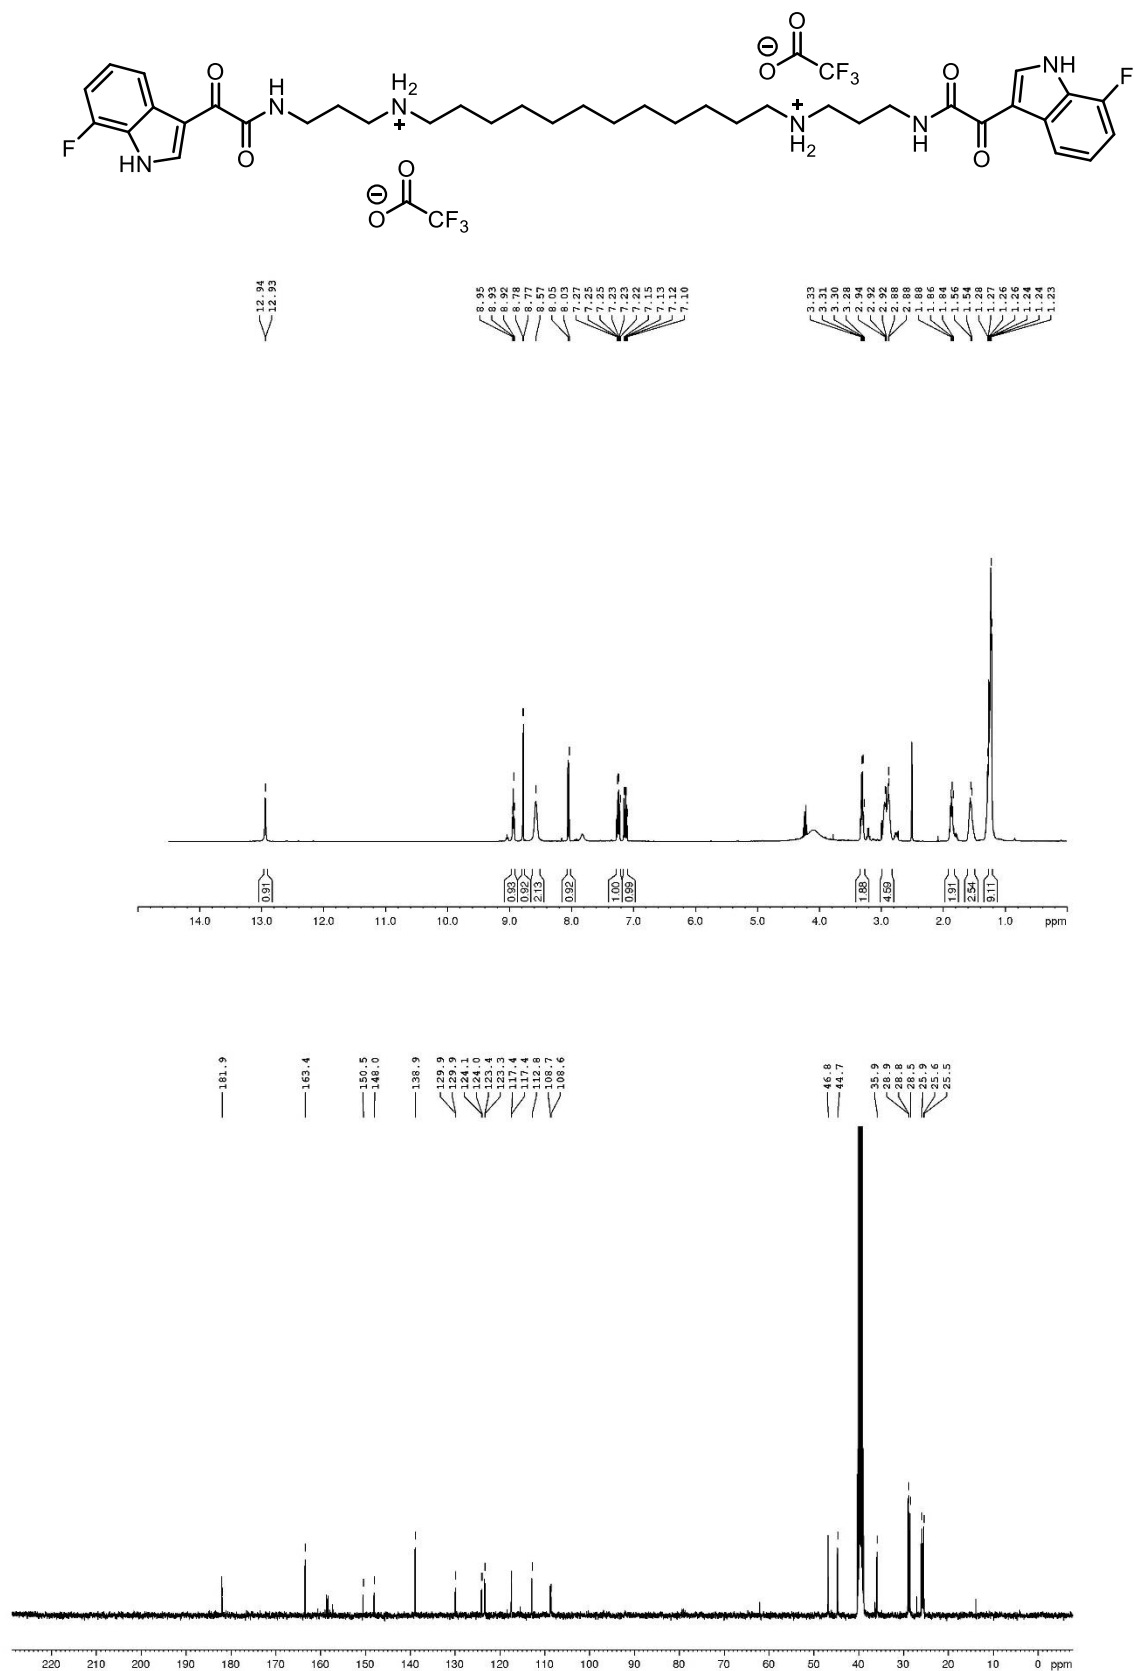

Figure S22 <sup>1</sup>H (DMSO-d<sub>6</sub>, 400 MHz) and <sup>13</sup>C (DMSO-d<sub>6</sub>, 100 MHz) NMR spectra for **21e**

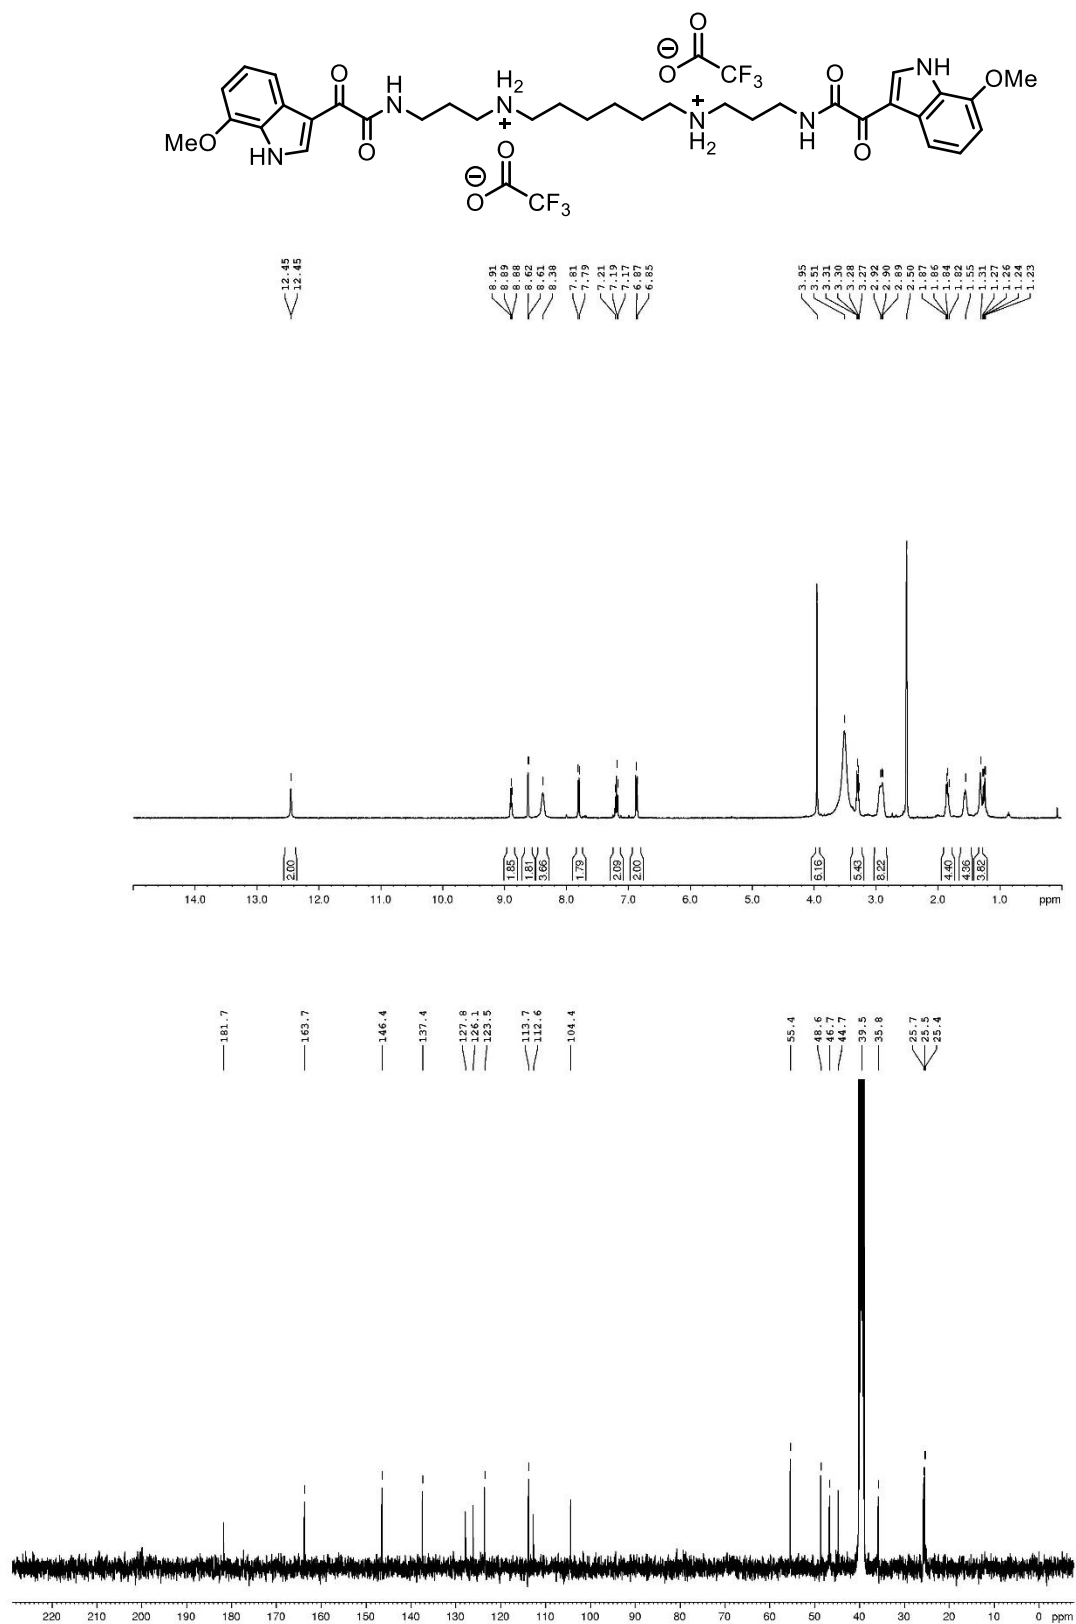

**Figure S23**  $^1\text{H}$  (DMSO- $d_6$ , 400 MHz) and  $^{13}\text{C}$  (DMSO- $d_6$ , 100 MHz) NMR spectra for **22a**

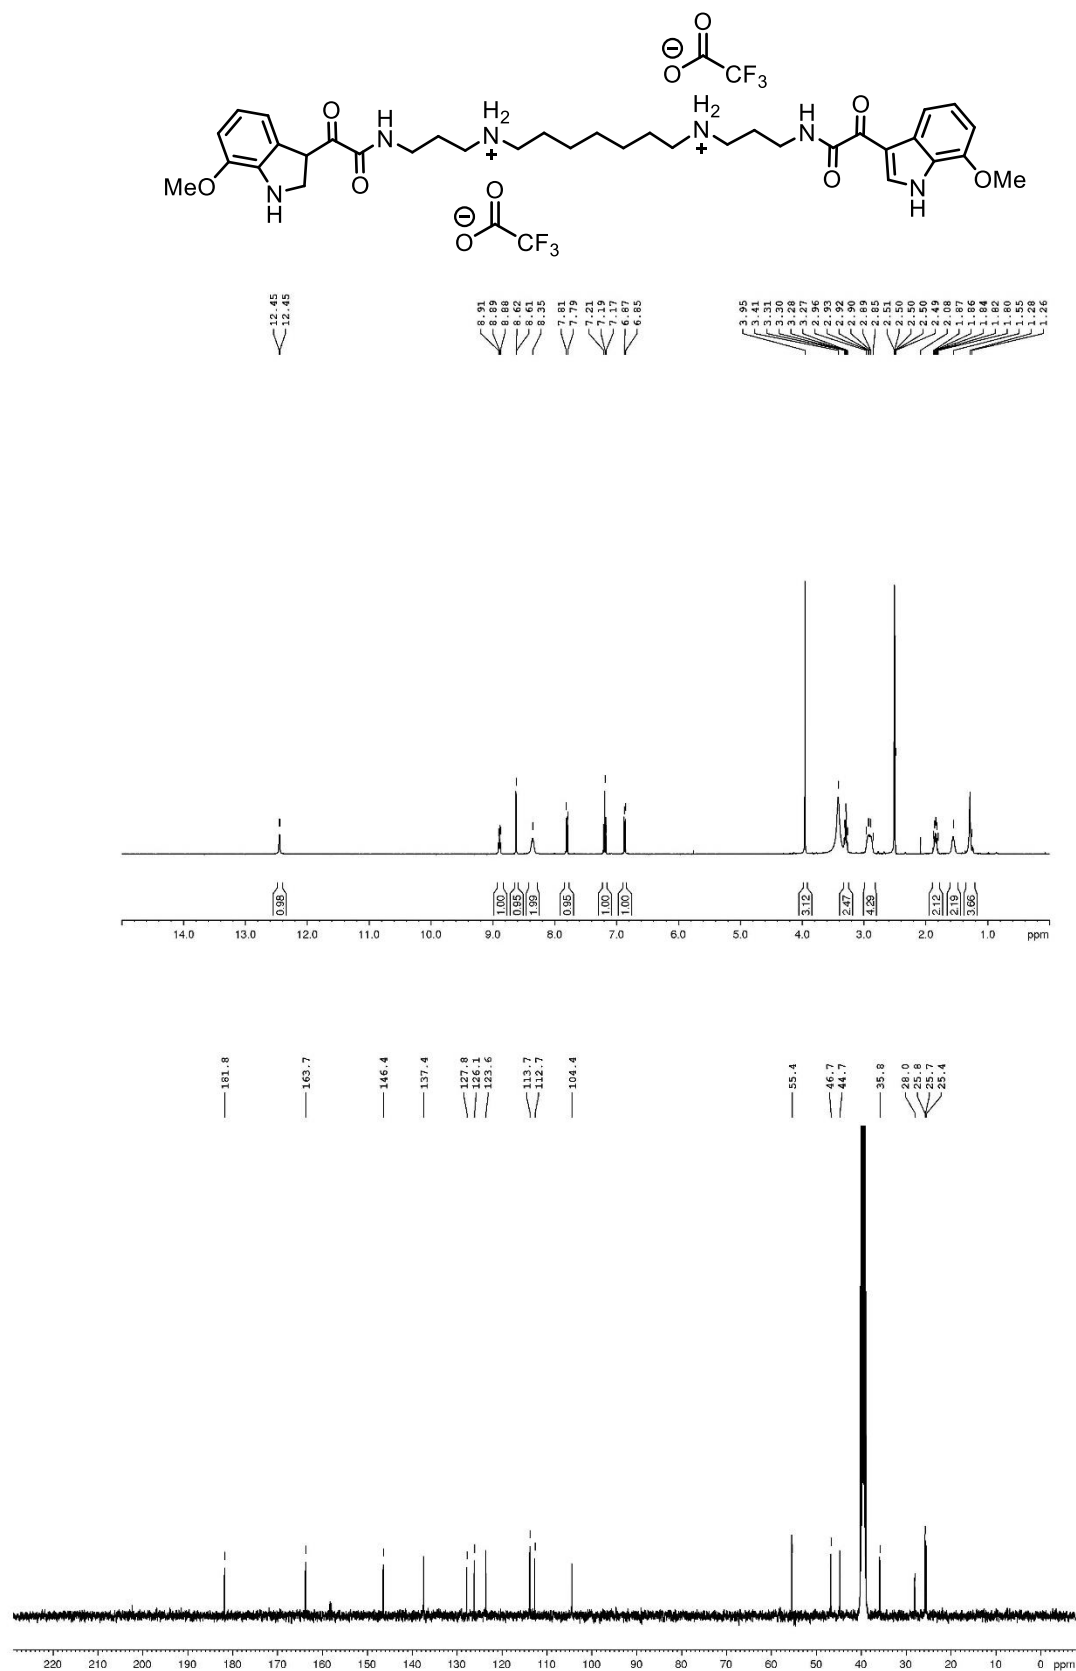

**Figure S24** <sup>1</sup>H (DMSO-*d*<sub>6</sub>, 400 MHz) and <sup>13</sup>C (DMSO-*d*<sub>6</sub>, 100 MHz) NMR spectra for **22b**

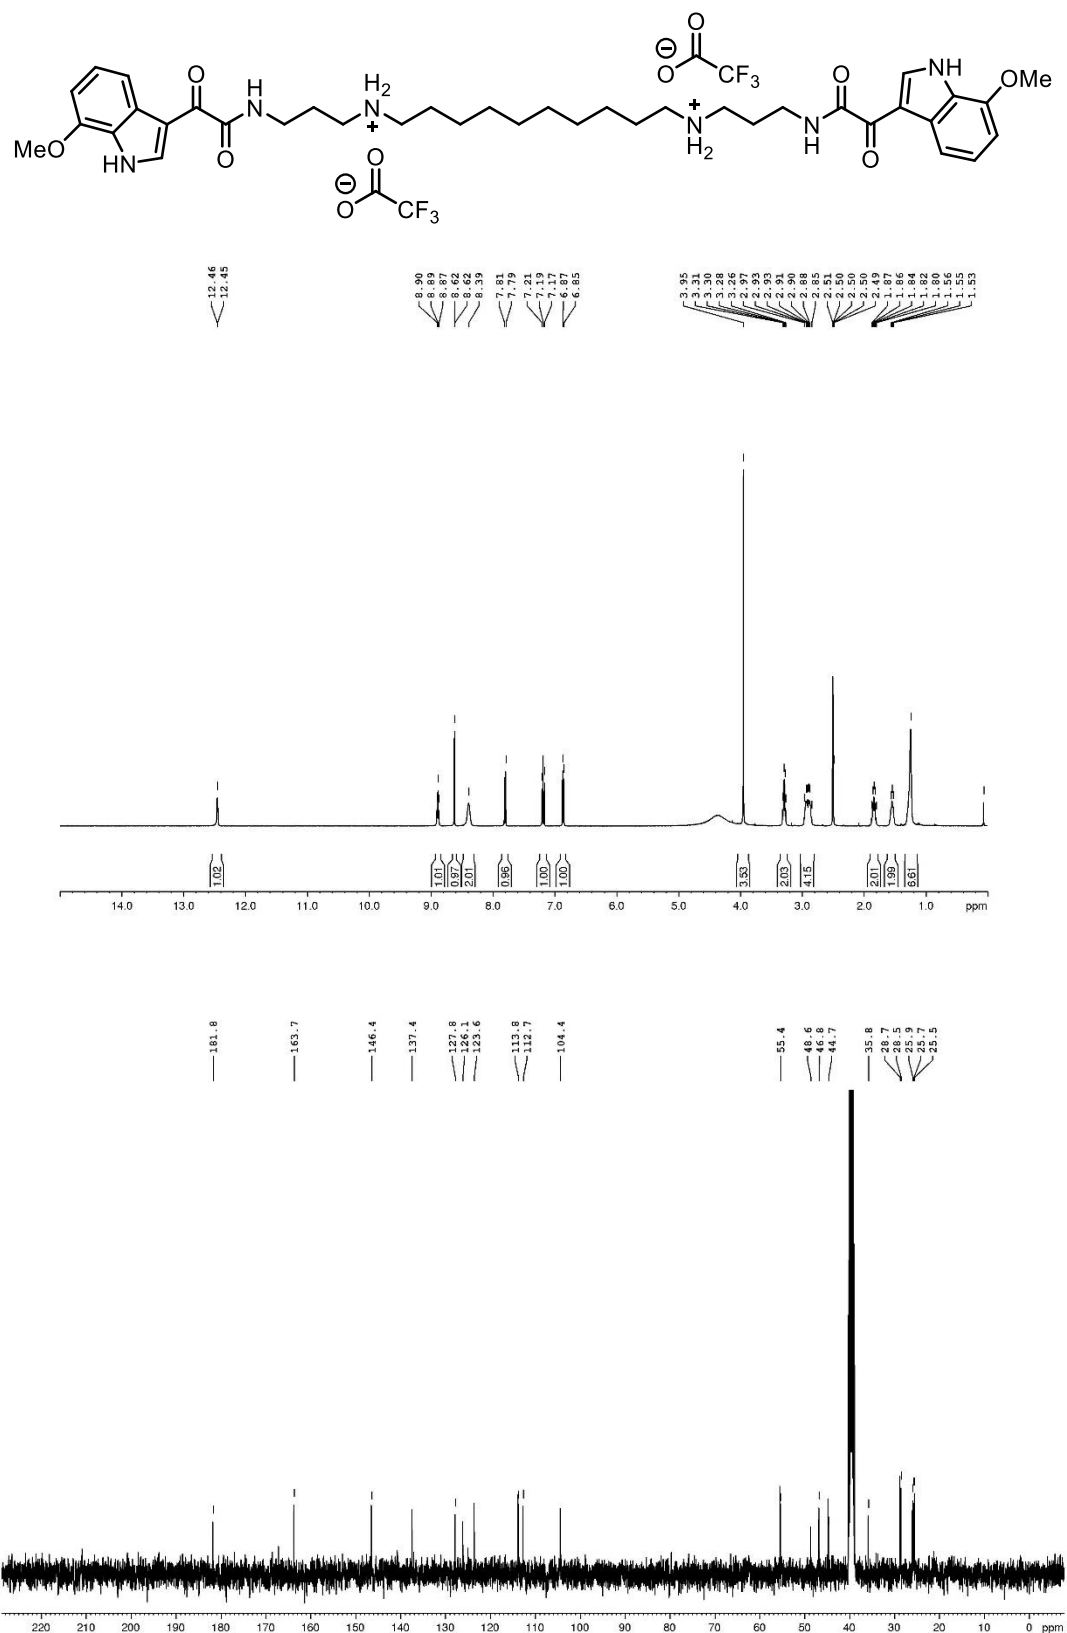

**Figure S25**  $^1\text{H}$  (DMSO- $d_6$ , 400 MHz) and  $^{13}\text{C}$  (DMSO- $d_6$ , 100 MHz) NMR spectra for **22d**

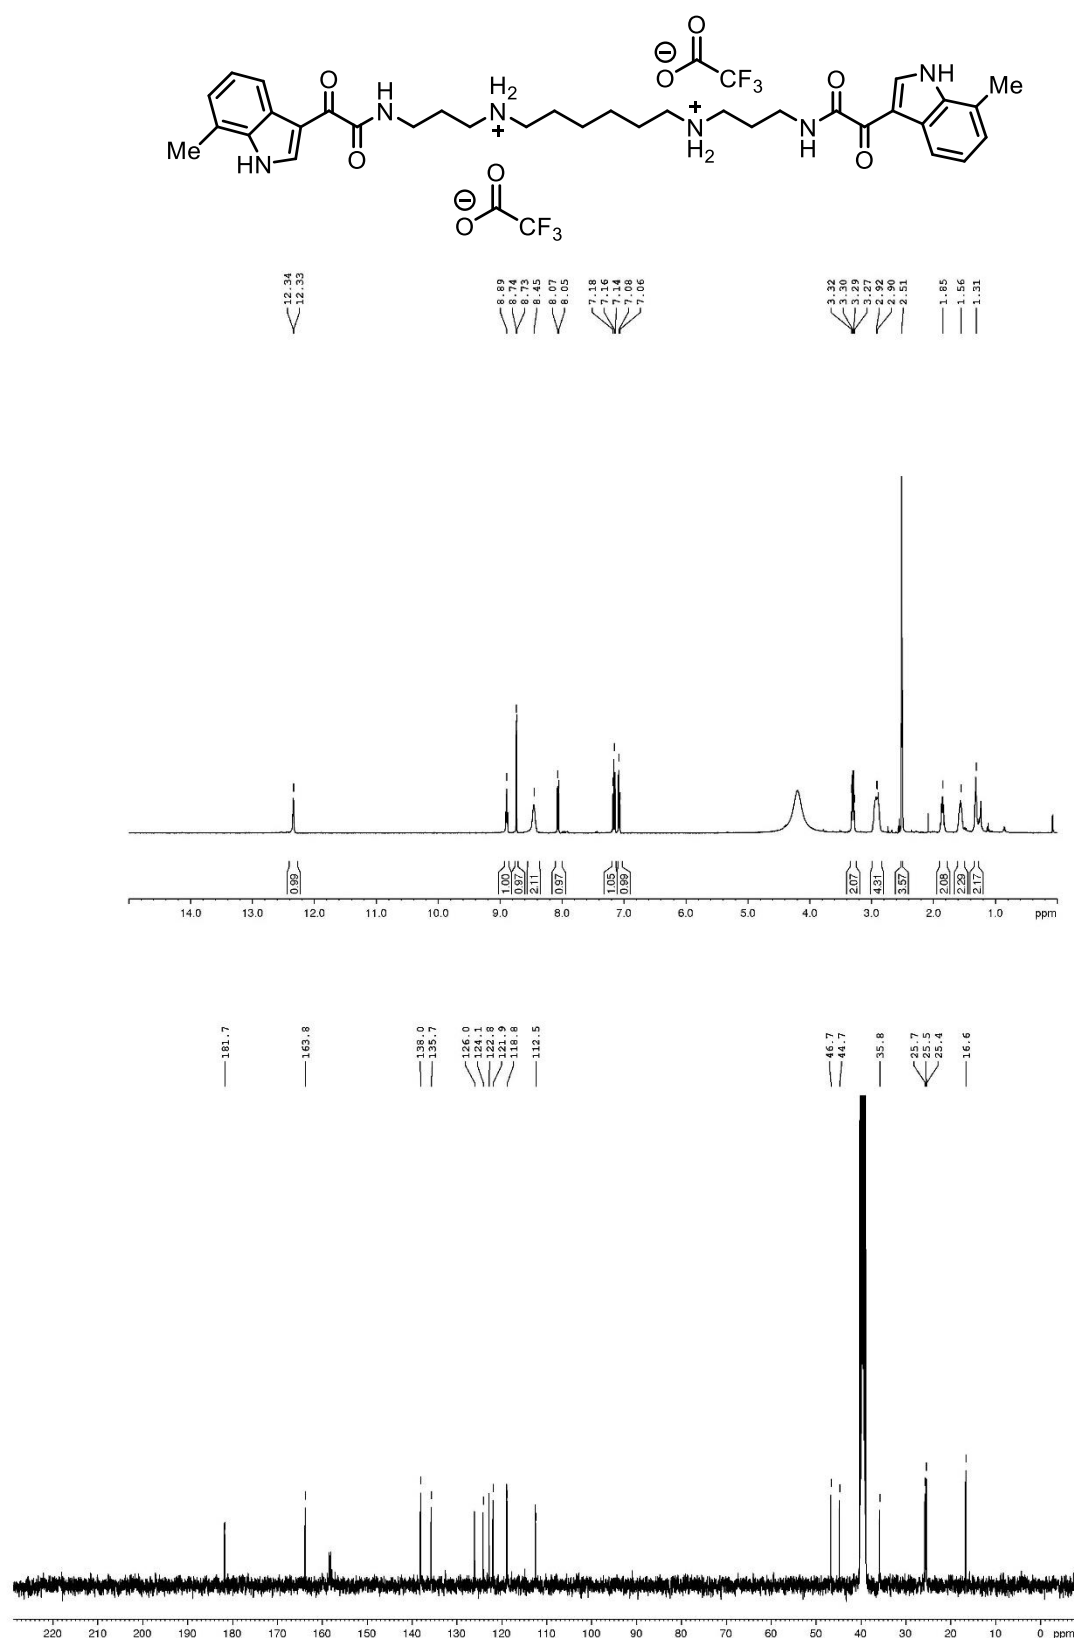

**Figure S26**  $^1\text{H}$  (DMSO- $d_6$ , 400 MHz) and  $^{13}\text{C}$  (DMSO- $d_6$ , 100 MHz) NMR spectra for **23a**

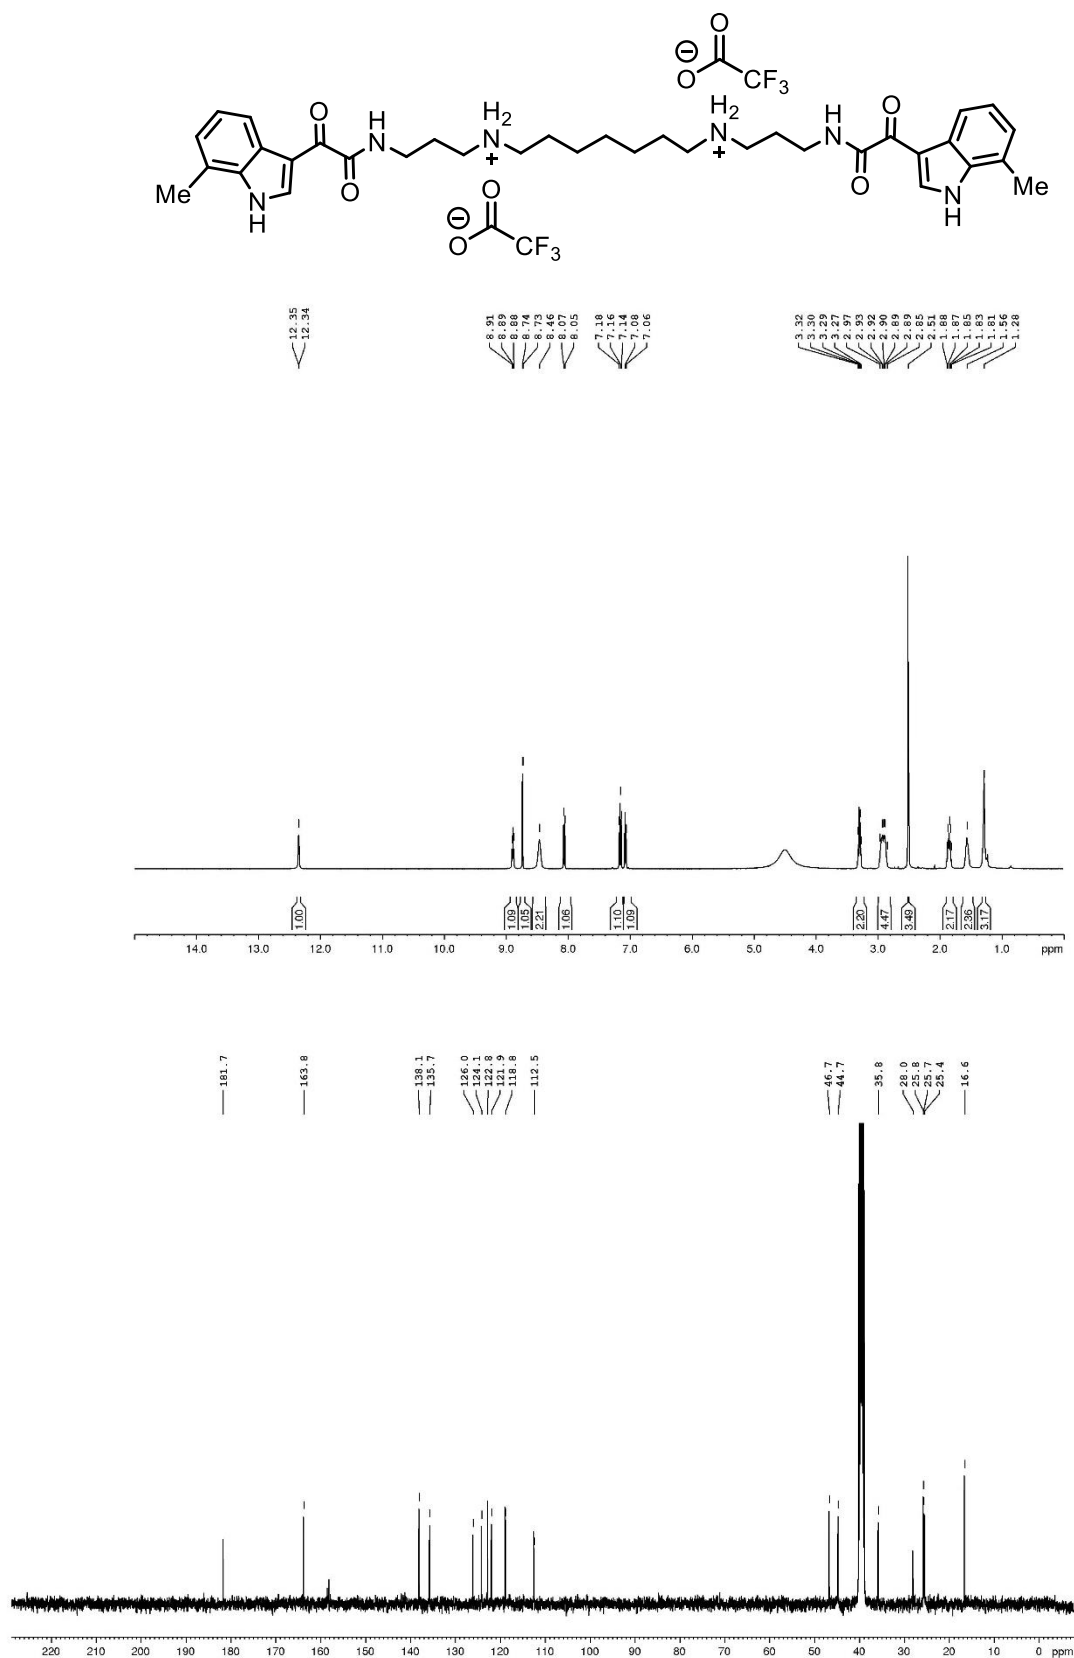

**Figure S27**  $^1\text{H}$  (DMSO- $d_6$ , 400 MHz) and  $^{13}\text{C}$  (DMSO- $d_6$ , 100 MHz) NMR spectra for **23b**

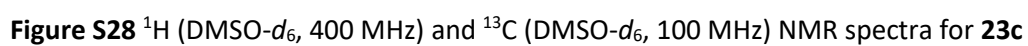

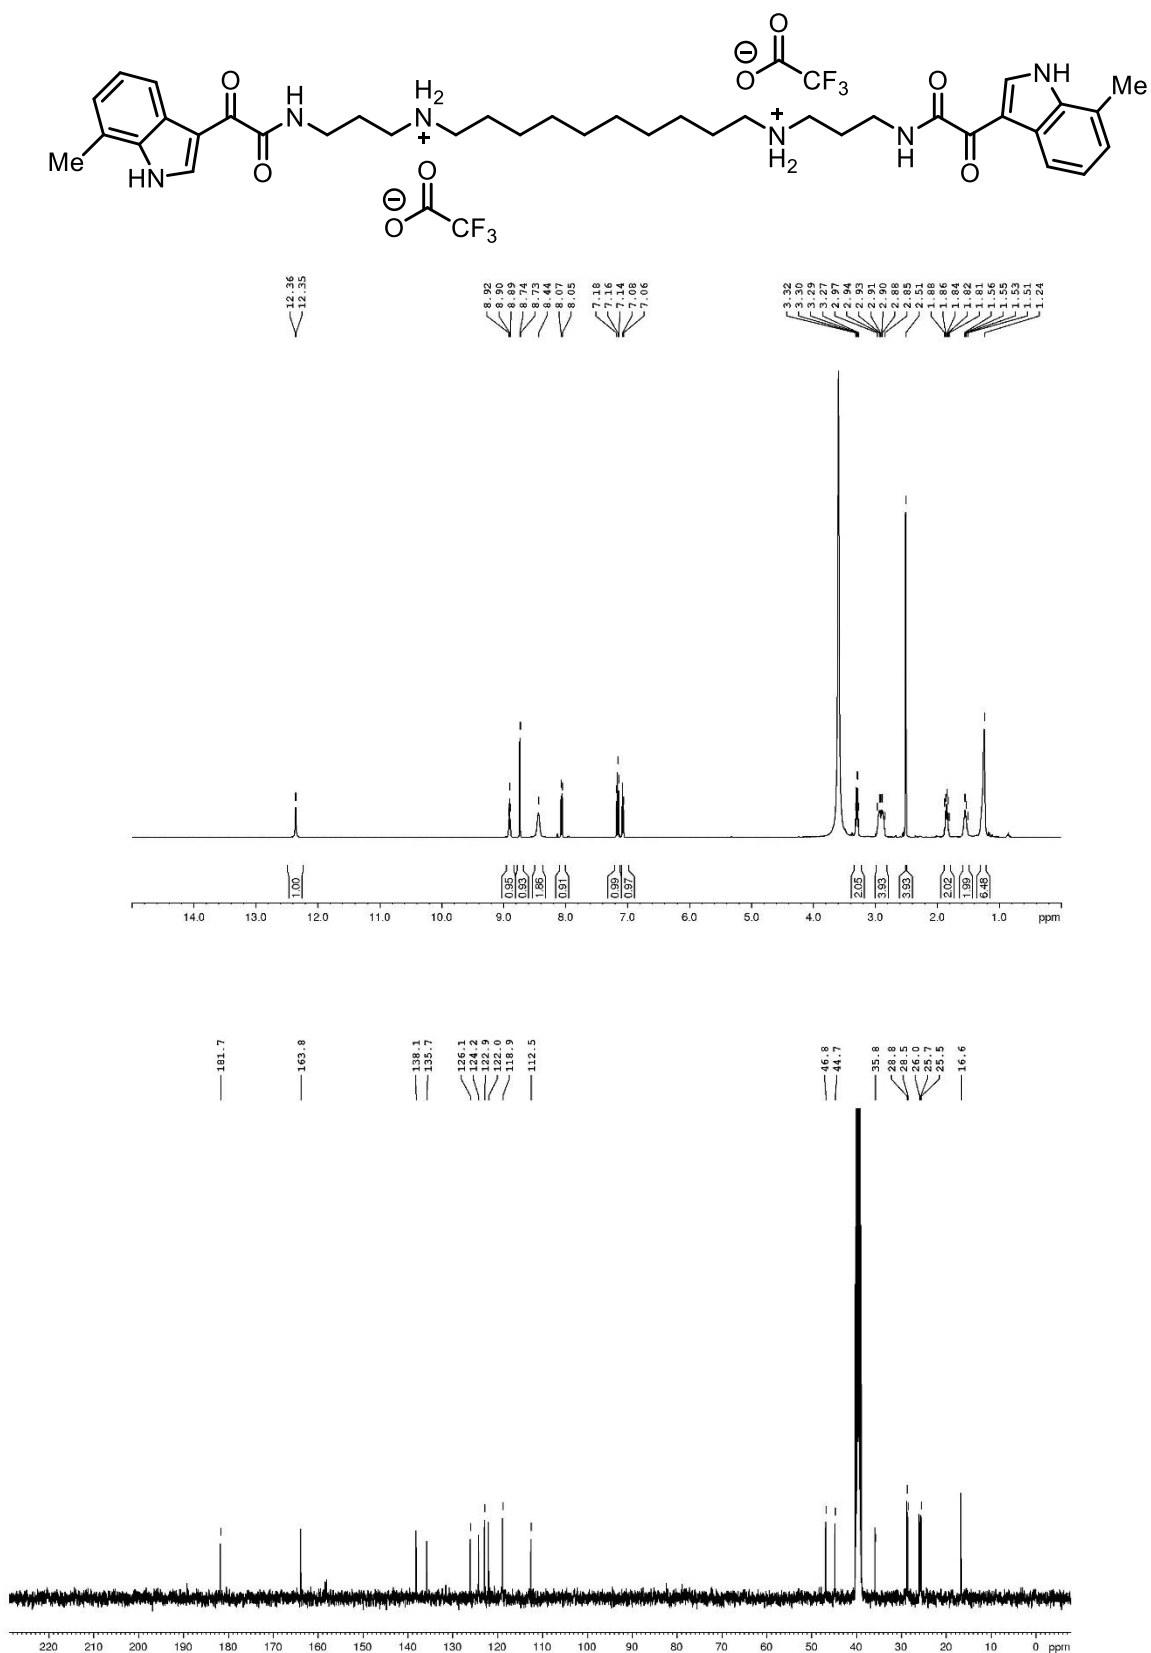

**Figure S29**  $^1\text{H}$  (DMSO- $d_6$ , 400 MHz) and  $^{13}\text{C}$  (DMSO- $d_6$ , 100 MHz) NMR spectra for **23d**

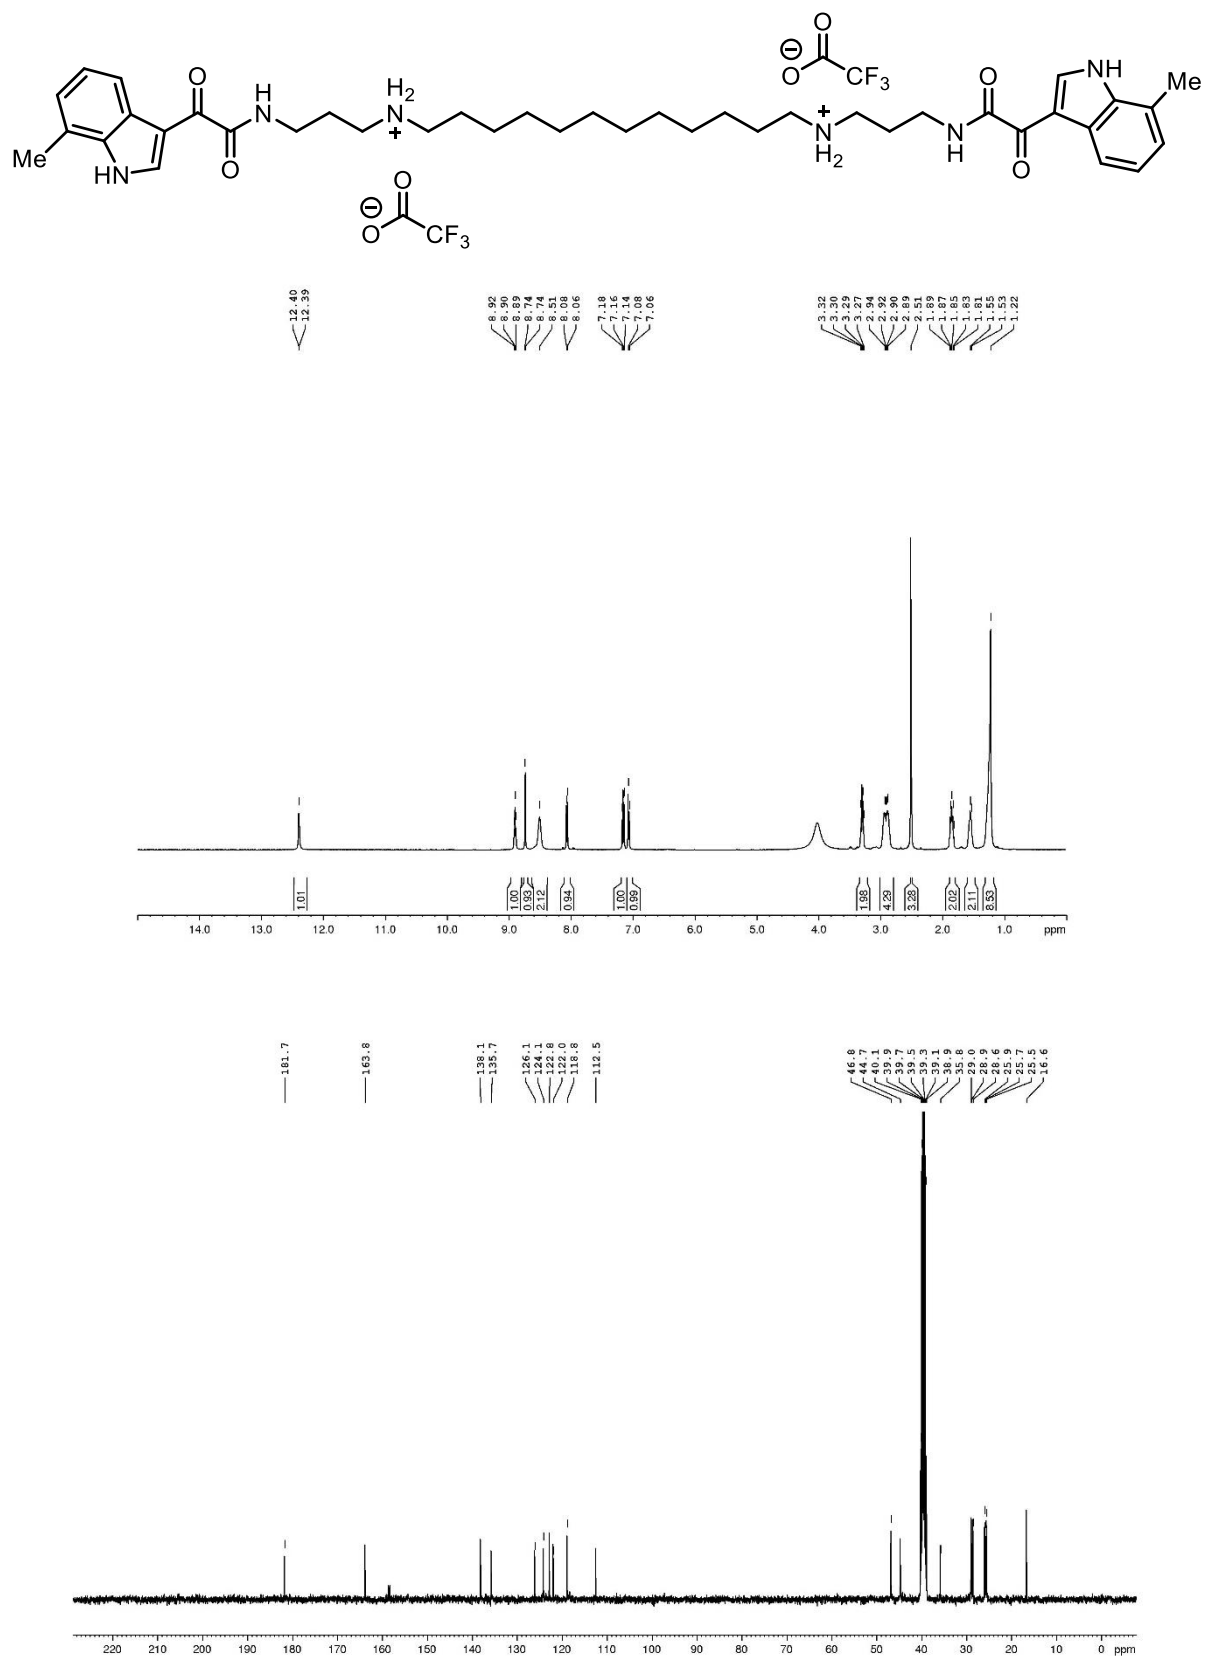

**Figure S30**  $^1\text{H}$  ( $\text{DMSO-}d_6$ , 400 MHz) and  $^{13}\text{C}$  ( $\text{DMSO-}d_6$ , 100 MHz) NMR spectra for **23e**
